# Supplementary material for: Platelet-derived microparticles induce CD8+ T cell senescence in end-stage renal disease via the transfer of microRNA-550a-5p
Source: Research Square preprint supplement (doi:10.21203/rs.3.rs-8468315/v1), 2026-01-27
Supplement: Supplementary file 1 [file 1a43536fca325dc475e270c7.docx]

Supplemental Material
1. Supplementary Tables

2. Supplementary Figures

**Supplementary Tables**

**Table S1 The basic characteristic of the enrolled volunteers**

| Variables | HC (N = 45) | CKD (N = 75) | P-value |
| --- | --- | --- | --- |
| Age, y | 35.2 ± 5.8 | 35.6 ± 5.7 | .740 |
| Male, n (%) | 21 (46.7%) | 46 (61.3%) | 0.169 |
| Current smoker, n (%) | 8 (17.8%) | 23 (30.7%) | 0.178 |
| Platelet counts, ×109/L | 252.4 ± 67.1 | 212.5 ± 69.9 | 0.003 |
| Plateletcrit, % | 0.3 ± 0.1 | 0.2 ± 0.1 | 0.002 |
| Mean platelet volume, fl | 10.5 ± 1.3 | 10.7 ± 1.2 | 0.448 |
| Platelet-large cell ratio, % | 27.5 ± 8.1 | 35.8 ± 48.8 | 0.152 |
| Platelet distribution width, % | 13.2 ± 2.7 | 13.3 ± 3.3 | 0.935 |
| Lymphocyte count, ×109/L | 2.2 ± 0.9 | 1.6 ± 0.6 | <.001 |
| Lymphocyte percentage, % | 28.1 ± 8.3 | 23.0 ± 7.6 | <.001 |
| Uric acid, μmol/L | 344.4 ± 64.3 | 519.5 ± 597.7 | 0.014 |
| Urea, mmol/L | 5.1 ± 1.6 | 18.3 ± 9.7 | <.001 |
| SCr, μmol/L | 66.6 ± 16.0 | 509.6 ± 302.3 | <.001 |
| eGFR, mL/min/1.73 m2 | 113.6 ± 12.5 | 18.6 ± 16.2 | <.001 |
| Calcium, mmol/L | 2.3 ± 0.2 | 2.1 ± 0.3 | <.001 |
| Phosphorus, mmol/L | 1.1 ± 0.2 | 1.5 ± 0.5 | <.001 |

Abbreviations: HC, healthy control; CKD, chronic kidney disease; SCr, serum creatinine; eGFR, estimated glomerular filtration rate.

**Table S2. The sequence sets for angimor.**

| agomir (human) | Primer Sequence (5'-3') | |
| --- | --- | --- |
| hsa-miR-550a-5p agomir | Sense (5'-3') | AGUGCCUGAGGGAGUAAGAGCCC |
| Antisense (5'-3') | GGGCUCUUACUCCCUCAGGCACU |
| mimics nc | Sense (5'-3') | UCACAACCUCCUAGAAAGAGUAGA |
| Antisense (5'-3') | UCUACUCUUUCUAGGAGGUUGUGA |

**Table S3. List of antibodies used in this study.**

| Antibodies | Source | Identifier | Assay |
| --- | --- | --- | --- |
| PE Anti-Human CD3 | Thermo Fisher | 12-0037-42 | FC |
| [APC Anti-Human CD4](https://www.casmart.com.cn/product-details/page/1269/320011444" \o "https://www.casmart.com.cn/product-details/page/1269/320011444) | Biolegend | 317416 | FC |
| [BV421 Anti-Human CD8](https://www.casmart.com.cn/product-details/page/1269/73339104" \o "https://www.casmart.com.cn/product-details/page/1269/73339104) | BD | 562428 | FC |
| [PE-CYN7 Anti-Human CD57](https://www.casmart.com.cn/product-details/page/1269/808077336" \o "https://www.casmart.com.cn/product-details/page/1269/808077336) | Thermo Fisher | 25-0577-42 | FC |
| BV605 Anti-Human PD-1 | BD | 563245 | FC |
| [EF450 Anti-Human CD28](https://www.casmart.com.cn/product-details/page/300070148/797706188" \o "https://www.casmart.com.cn/product-details/page/300070148/797706188) | Invitrogen | 48-0289-42 | FC |
| [FITC Anti-Human/Mouse Phospho-H2A.X (Ser139)](https://www.casmart.com.cn/product-details/page/1269/491537315" \o "https://www.casmart.com.cn/product-details/page/1269/491537315) | BioLegend | 613404 | FC/WB/IF |
| Anti-human/mouse p21 antibody | abcam | ab188224 | FC/WB/IF |
| [Anti-Human/Mouse PMPCB antibody](https://www.casmart.com.cn/product-details/page/1269/883828431" \o "https://www.casmart.com.cn/product-details/page/1269/883828431) | Thermo Fisher | MA549303 | WB/IF |
| [Anti-Human/Mouse NDUFS8 antibody](https://www.casmart.com.cn/product-details/page/1269/383882147" \o "https://www.casmart.com.cn/product-details/page/1269/383882147) | abcam | ab170936 | WB |
| [APC-CY7 Anti-Mouse CD3](https://www.casmart.com.cn/product-details/page/1269/73339740" \o "https://www.casmart.com.cn/product-details/page/1269/73339740) | Biolegend | 100222 | FC |
| PE-Cy7 Anti-Mouse CD8α | Abmart | FL200805S | FC |
| [BV605 Anti-Mouse CD44](https://www.casmart.com.cn/product-details/page/1269/73339614" \o "https://www.casmart.com.cn/product-details/page/1269/73339614) | BD | 563058 | FC |
| [PE Anti-Mouse CD153](https://www.casmart.com.cn/product-details/page/300069986/849398659" \o "https://www.casmart.com.cn/product-details/page/300069986/849398659) | Biolegend | 106405 | FC |
| FITC Anti-Human CD41 | Biolegend | 303704 | FC |
| FITC Anti-Mouse CD41 | Biolegend | S0B5205-500T | FC |
| β-Actin antibody | Cell Signaling Technology | Ca# 3700 | WB |
| COX IV antibody | Servicebio | GB15250-100 | WB/IF |
| Goat anti-Rabbit IgG (H+L) Highly Cross-Adsorbed Secondary Antibody, Alexa Fluor 488 | Thermo Fisher Scientific | A11034 | FC |
| HRP labeled goat anti-Rabbit IgG (H+L) | Abcam | Cat# 205718 | WB |
| HRP labeled goat anti-Mouse IgG (H+L) | Abcam | Cat# 205719 | WB |

**Table S4. The sequence sets for siRNA**

| siRNA (human) | Primer Sequence (5'-3') | |
| --- | --- | --- |
| siPMPCB-si-1 | Sense (5'-3') | CGAAAAUGAGAAGAACAAUGGdTdT |
| Antisense (5'-3') | CCAUUGUUCUUCUCAUUUUCGdTdT |
| siPMPCB-si-2 | Sense (5'-3') | CAUUUCGGUGACUCUUUAUGCdTdT |
| Antisense (5'-3') | GCAUAAAGAGUCACCGAAAUGdTdT |
| siPMPCB-si-3 | Sense (5'-3') | GAAGUAUGUACCAAAUACAUUdTdT |
| Antisense (5'-3') | AAUGUAUUUGGUACAUACUUCdTdT |
| NC | Sense (5'-3') | UUCUCCGAACGUGUCACGUdTdT |
| Antisense (5'-3') | ACGUGACACGUUCGGAGAAdTdT |

**Table S5. The sequence sets for miRNA**

| Oligo (human) | Primer Sequence (5'-3') | |
| --- | --- | --- |
| hsa-miR-550a-5p mimics | Sense (5'-3') | AGUGCCUGAGGGAGUAAGAGCCC |
| Antisense (5'-3') | GGGCUCUUACUCCCUCAGGCACU |
| hsa-miR-550a-5p inhibitor | Sense (5'-3') |  |
| Antisense (5'-3') | GGGCUCUUACUCCCUCAGGCACU |
| mimics nc | Sense (5'-3') | UCACAACCUCCUAGAAAGAGUAGA |
| Antisense (5'-3') | UCUACUCUUUCUAGGAGGUUGUGA |
| inhibitor nc | Sense (5'-3') |  |
| Antisense (5'-3') | UCUACUCUUUCUAGGAGGUUGUGA |

**Table S6. The primer sets for human qPCR**

| Gene (human) | Primer Sequence (5'-3') |
| --- | --- |
| h-miR-550a-5p RT stem loop | GTCGTATCCAGTGCAGGGTCCGAGGTATTCGCACTGGATACGACGGGCTC |
| miR-550a-5p F | TGCTGTTAGGTTGTCTTCA |
| miR-550a-5p R | CTATGTTTTGTCCAATTTCT |
| hsa-miR-6804-5p RT stem loop | GTCGTATCCAGTGCAGGGTCCGAGGTATTCGCACTGGATACGACCGTCAC |
| hsa-miR-6804-5p-F | CGCGTGAGGGTGTCAGCAG |
| hsa-miR-6804-5p-R | AGTGCAGGGTCCGAGGTATT |
| hsa-miR-4470 RT stem loop | GTCGTATCCAGTGCAGGGTCCGAGGTATTCGCACTGGATACGACTCTCGG |
| hsa-miR-4470-F | GCGTGGCAAACGTGGAAG |
| hsa-miR-4470-R | AGTGCAGGGTCCGAGGTATT |
| hsa-miR-597-3p RT stem loop | GTCGTATCCAGTGCAGGGTCCGAGGTATTCGCACTGGATACGACACGCTT |
| hsa-miR-597-3p-F | GCGTGGTTCTCTTGTGGCTC |
| hsa-miR-597-3p-R | AGTGCAGGGTCCGAGGTATT |
| hsa-miR-4488 RT stem loop | GTCGTATCCAGTGCAGGGTCCGAGGTATTCGCACTGGATACGACCGCCGG |
| hsa-miR-4488-F | CGCGAGGGGGCGGGCT |
| hsa-miR-4488-R | AGTGCAGGGTCCGAGGTATT |
| h-U6 RT stem loop | GTCGTATGCAGAGCAGGGTCCGAGGTATTCGCACTGCATACGACAAAATATGG |
| h-U6 F | CTCGCTTCGGCAGCACA |
| h-U6 R | AACGCTTCACGAATTTGCGT |
| PMPCB-F | TGGGGTTTCAGCGAGAGTCT |
| PMPCB-R | TGGGTAGCAGCCTGTGTACTT |
| GHITM-F | GGCCTCAGTATGTCAAGGATAGA |
| GHITM-R | GCGTTCTGCTGATTGCTATGG |
| SLC25A37-F | GATGGGGACAGCCGAGATG |
| SLC25A37-R | ACCGGGTACATGACCGAGT |
| BCL2L2-F | GCGGAGTTCACAGCTCTATAC |
| BCL2L2-R | AAAAGGCCCCTACAGTTACCA |
| NDUFS8-F | CCATCAACTACCCGTTCGAGA |
| NDUFS8-R | CCGCAGTAGATGCACTTGG |
| IFN-γ-F | TCGGTAACTGACTTGAATGTCCA |
| IFN-γ-R | TCGCTTCCCTGTTTTAGCTGC |
| TNF-α-F | CCTCTCTCTAATCAGCCCTCTG |
| TNF-α-R | GAGGACCTGGGAGTAGATGAG |
| β-actin-F | CATGTACGTTGCTATCCAGGC |
| β-actin-R | CTCCTTAATGTCACGCACGAT |

**Table S7. The primer sets for mouse qPCR**

| Gene (mouse) | Primer Sequence (5'-3') |
| --- | --- |
| mmu-IFN-γ-F | AGCAAGGCGAAAAAGGATGC |
| mmu-IFN-γ-R | TCATTGAATGCTTGGCGCTG |
| mmu-TNF-α-F | CCCTCACACTCACAAACCAC |
| mmu-TNF-α-R | ACAAGGTACAACCCATCGGC |
| mmu-β-actin-F | TGAGCTGCGTTTTACACCCT |
| mmu-β-actin-R | GCCTTCACCGTTCCAGTTTT |

**Table S8. Predicted targets of miR-550-5p using TargetScan, miRDB and MitoCarta.**

| GENE | | | |
| --- | --- | --- | --- |
| NT5DC3 | PRELID2 | SLC25A37 | GHITM |
| UNG | PMPCB | ALKBH1 | WARS2 |
| BCL2L2 | MRPL44 | CYP27B1 | SUCLA2 |
| RNASEH1 | PDP2 | ECHDC2 | MTFMT |
| GTPBP10 | NDUFAF4 | HOGA1 |  |

**Supplemental Figures**

Figure S1

**
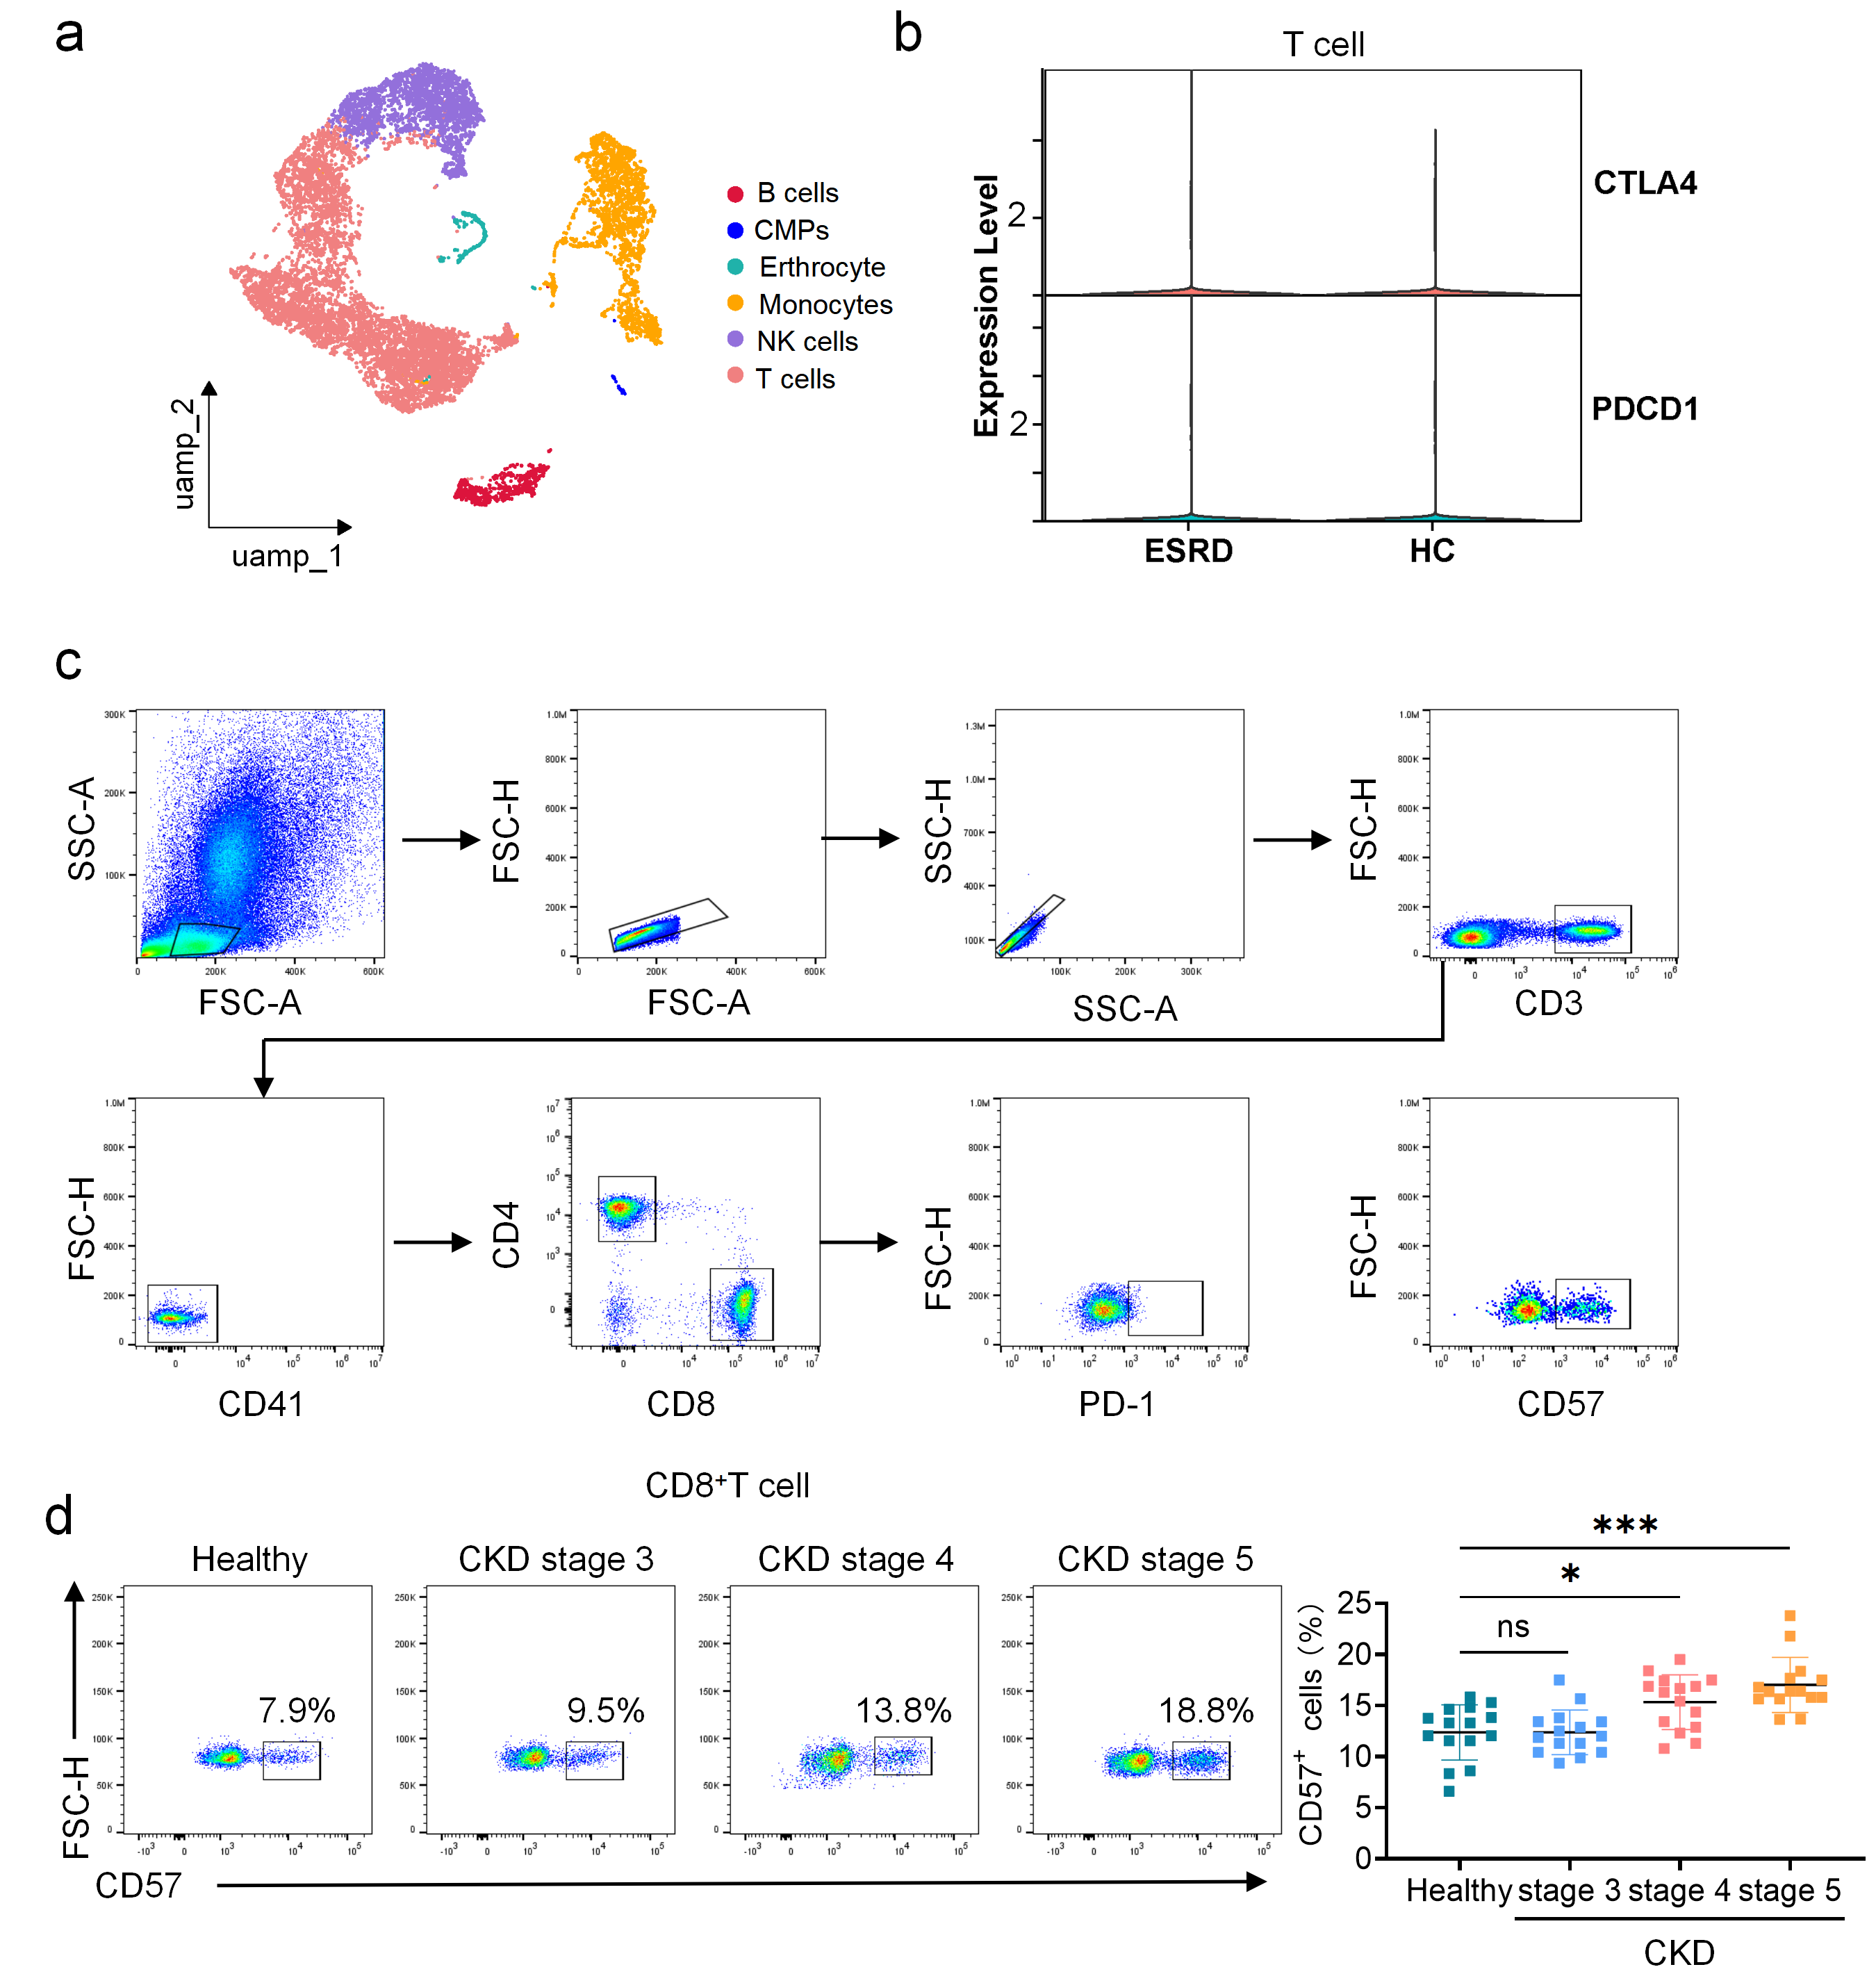
**

**Figure S1. Premature senescence in CD8+ T cells progressively develop along with advancing CKD.** (a) t-SNE projection of PBMCs from healthy controls and ESRD patients, colored by major cell clusters identified through scRNA-seq analysis. CMPs: Common Myeloid Progenitors. (b) Comparison of the PD-1 and CTLA4 expression in CD8+ T cells between the ESRD group and healthy group through scRNA-seq analysis. (c) Gating strategy of flow cytometry. (d) Flow cytometric analysis of the proportion of CD57+ cells in CD8+ T cells between healthy controls and CKD patients with stage 3-5 (n = 15). Data are presented as mean ± SD and were analyzed by one-way ANOVA. ns: no significance. *P < 0.05, ***P < 0.001.

Figure S2


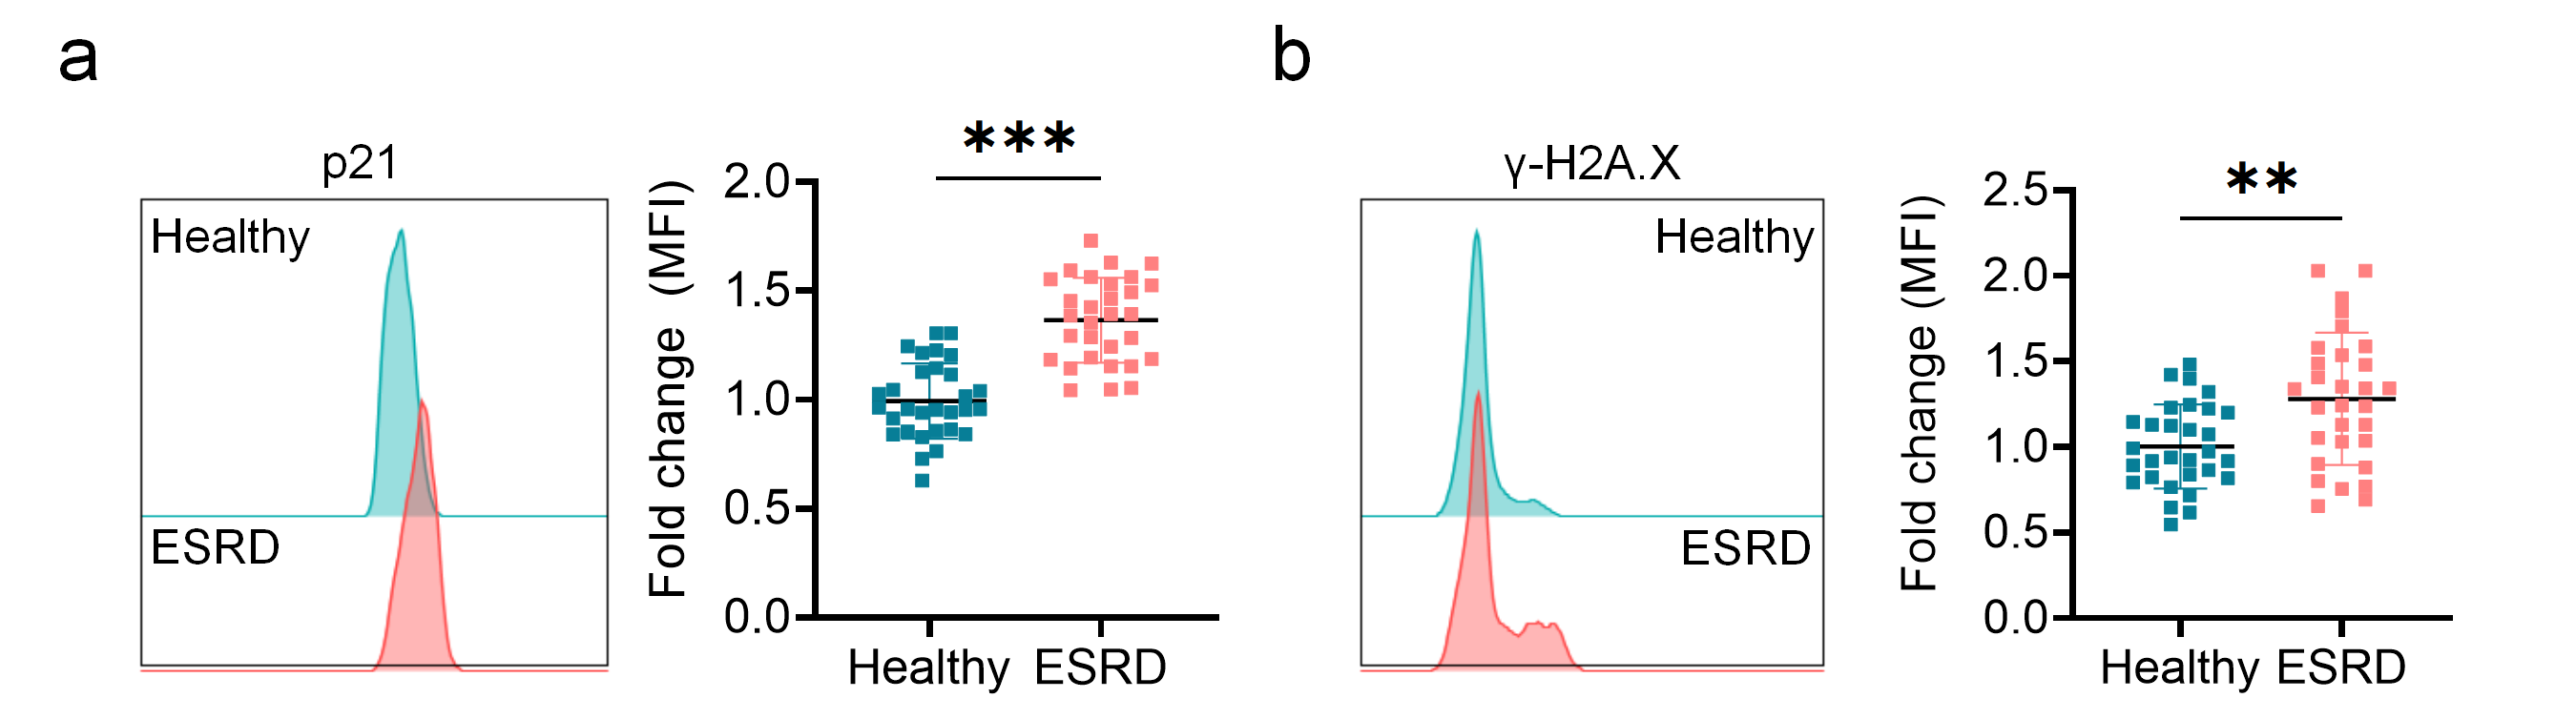


**Figure S2. CD8+ T cells exhibit upregulated senescence biomarkers in ESRD.** (a, b) Representative flow cytometry plots showing the expression levels of p21 expression (a) and γ-H2A.X level (b) in CD8⁺ T cells of healthy controls and ESRD patients (n = 30). Data are presented as mean ± SD and were analyzed by 2-tailed, unpaired Student's t-test. **P < 0.01, ***P < 0.001.

Figure S3

**
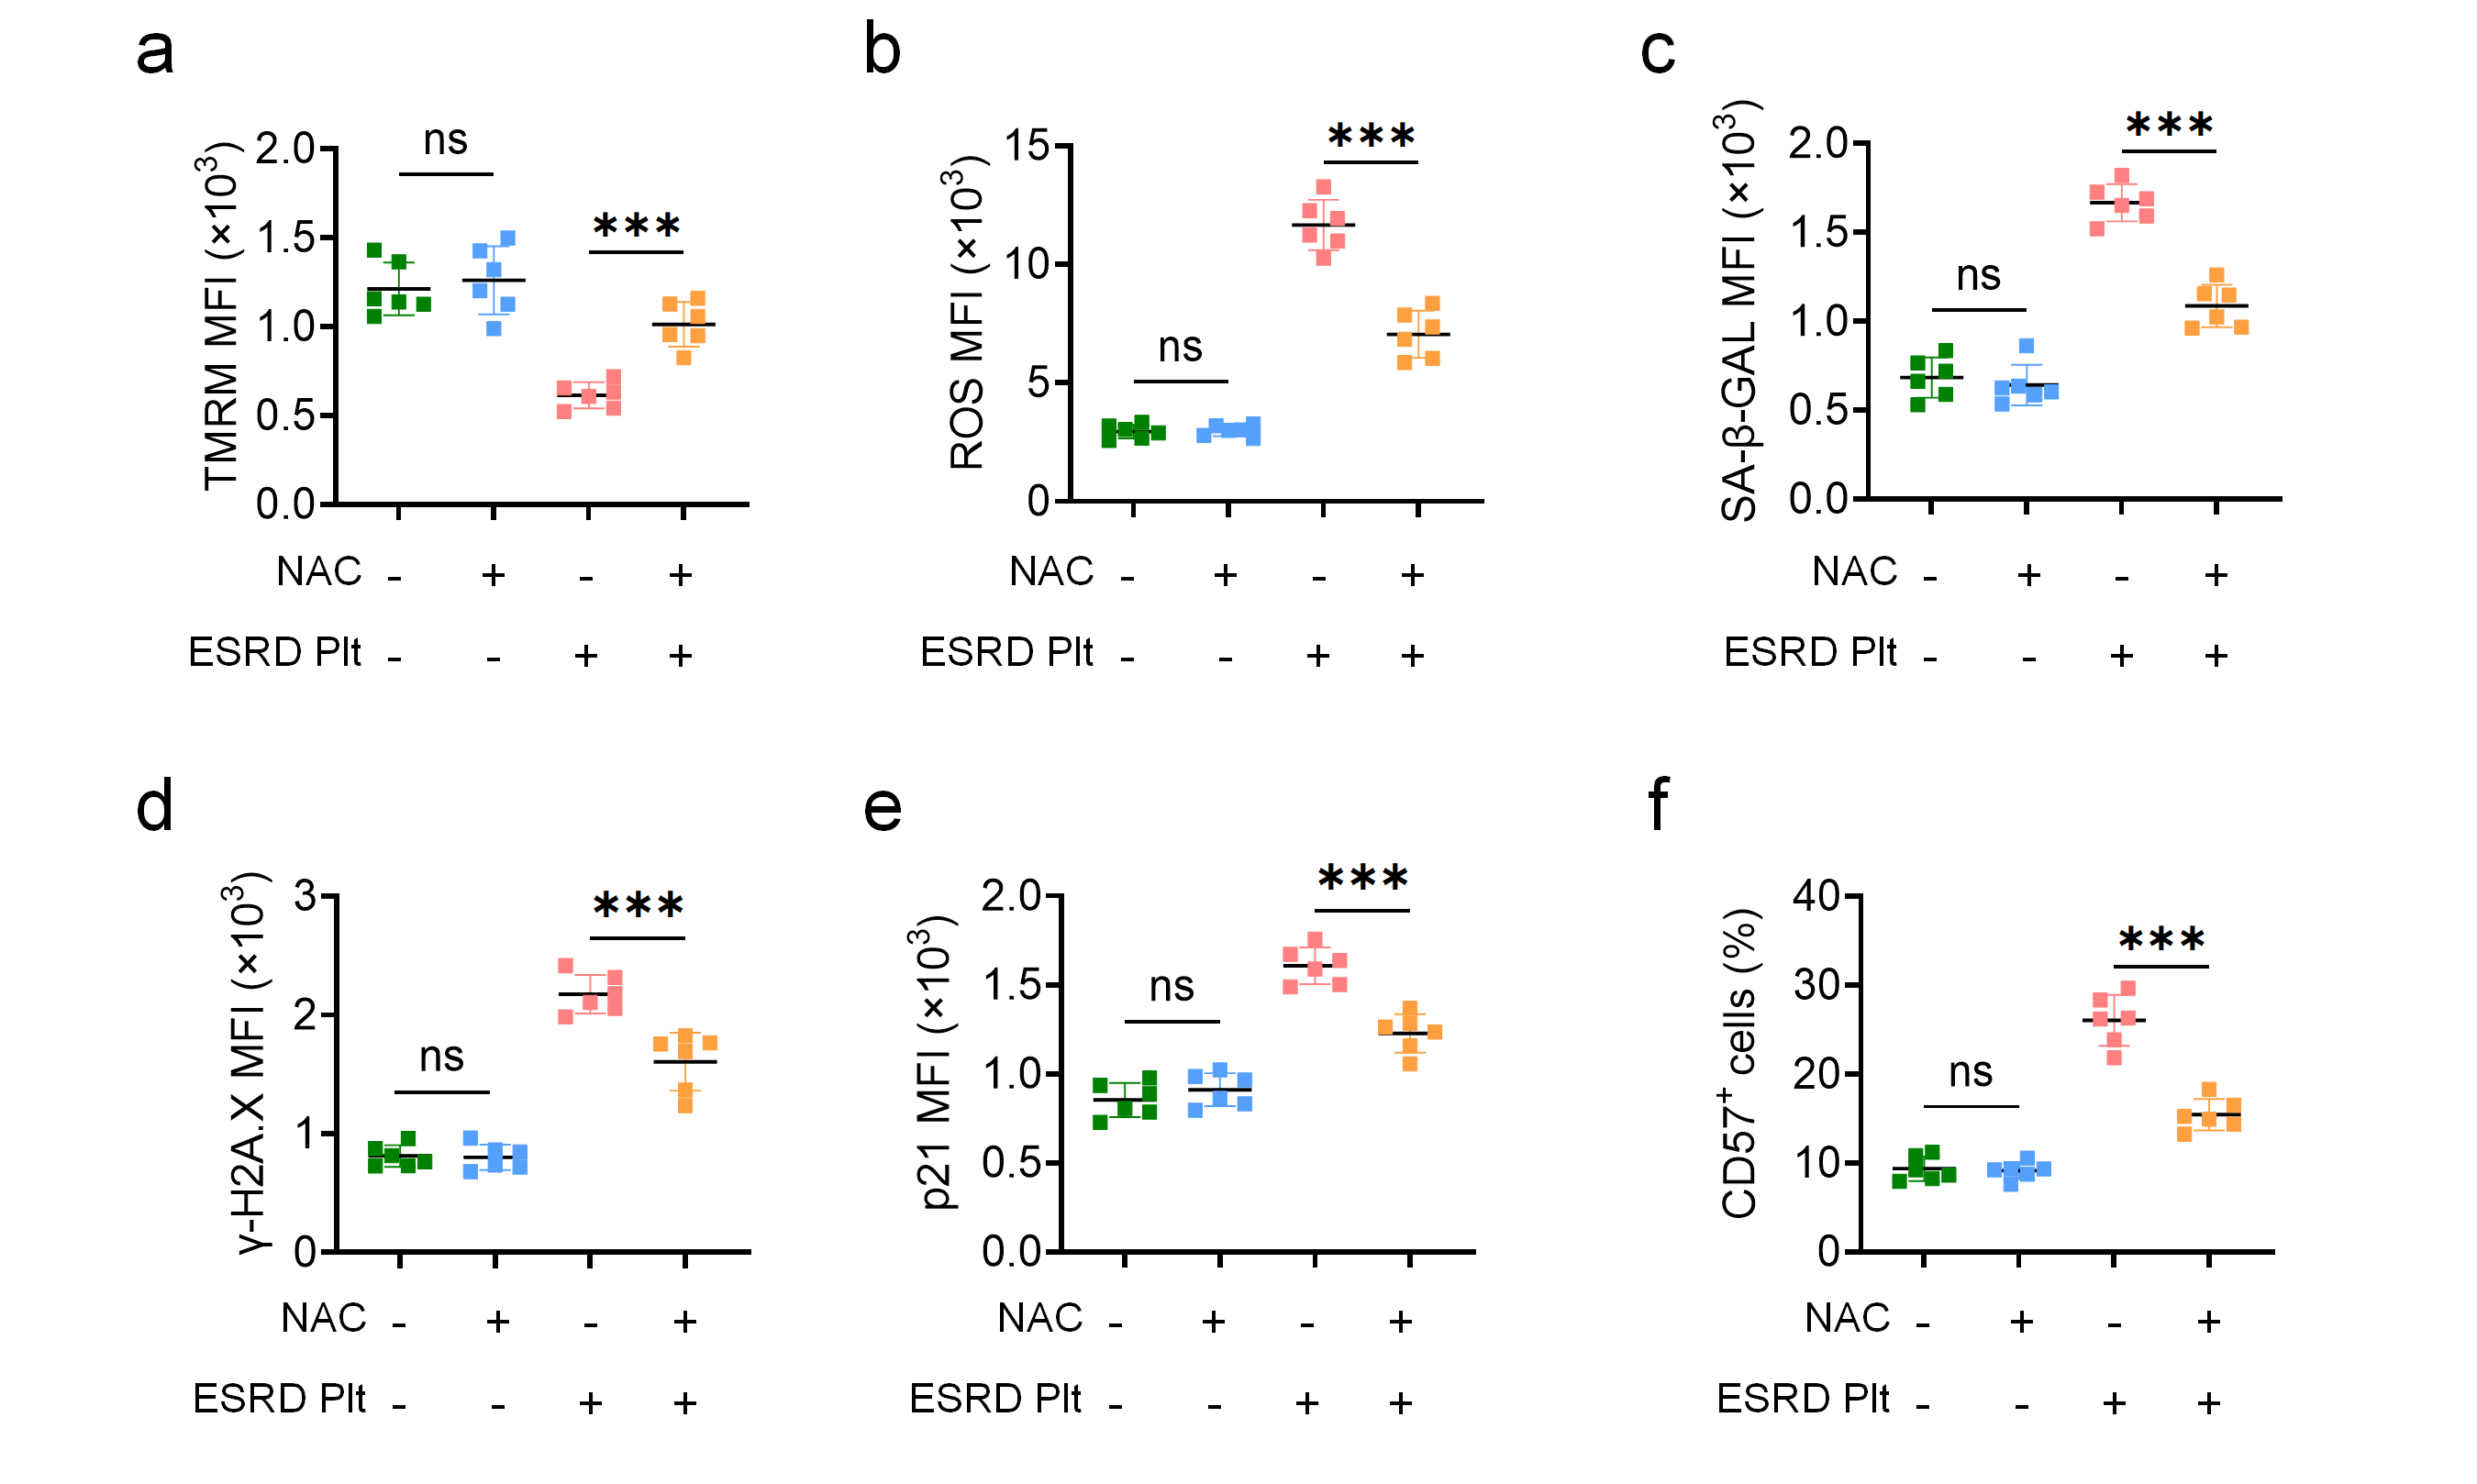
**

**Figure S3. NAC significantly alleviates premature CD8+ T cell senescence induced by platelets from ESRD patients.** (a, b) Flow cytometric analysis of TMRM levels (a) and ROS levels (b) in CD8⁺ T cells on day 3 of co-culture, with or without supplementation of 5 mM NAC. (c-f) Flow cytometric analysis of SA-β-Gal activity (c), γ-H2AX level (d), p21 expression (e) and proportion of CD57⁺ cells (f) in CD8⁺ T cell on day 5 of co-culture, with or without supplementation of 5 mM NAC (n = 6). Data are presented as mean ± SD and were analyzed by one-way ANOVA. ***P < 0.001.

Figure S4

**
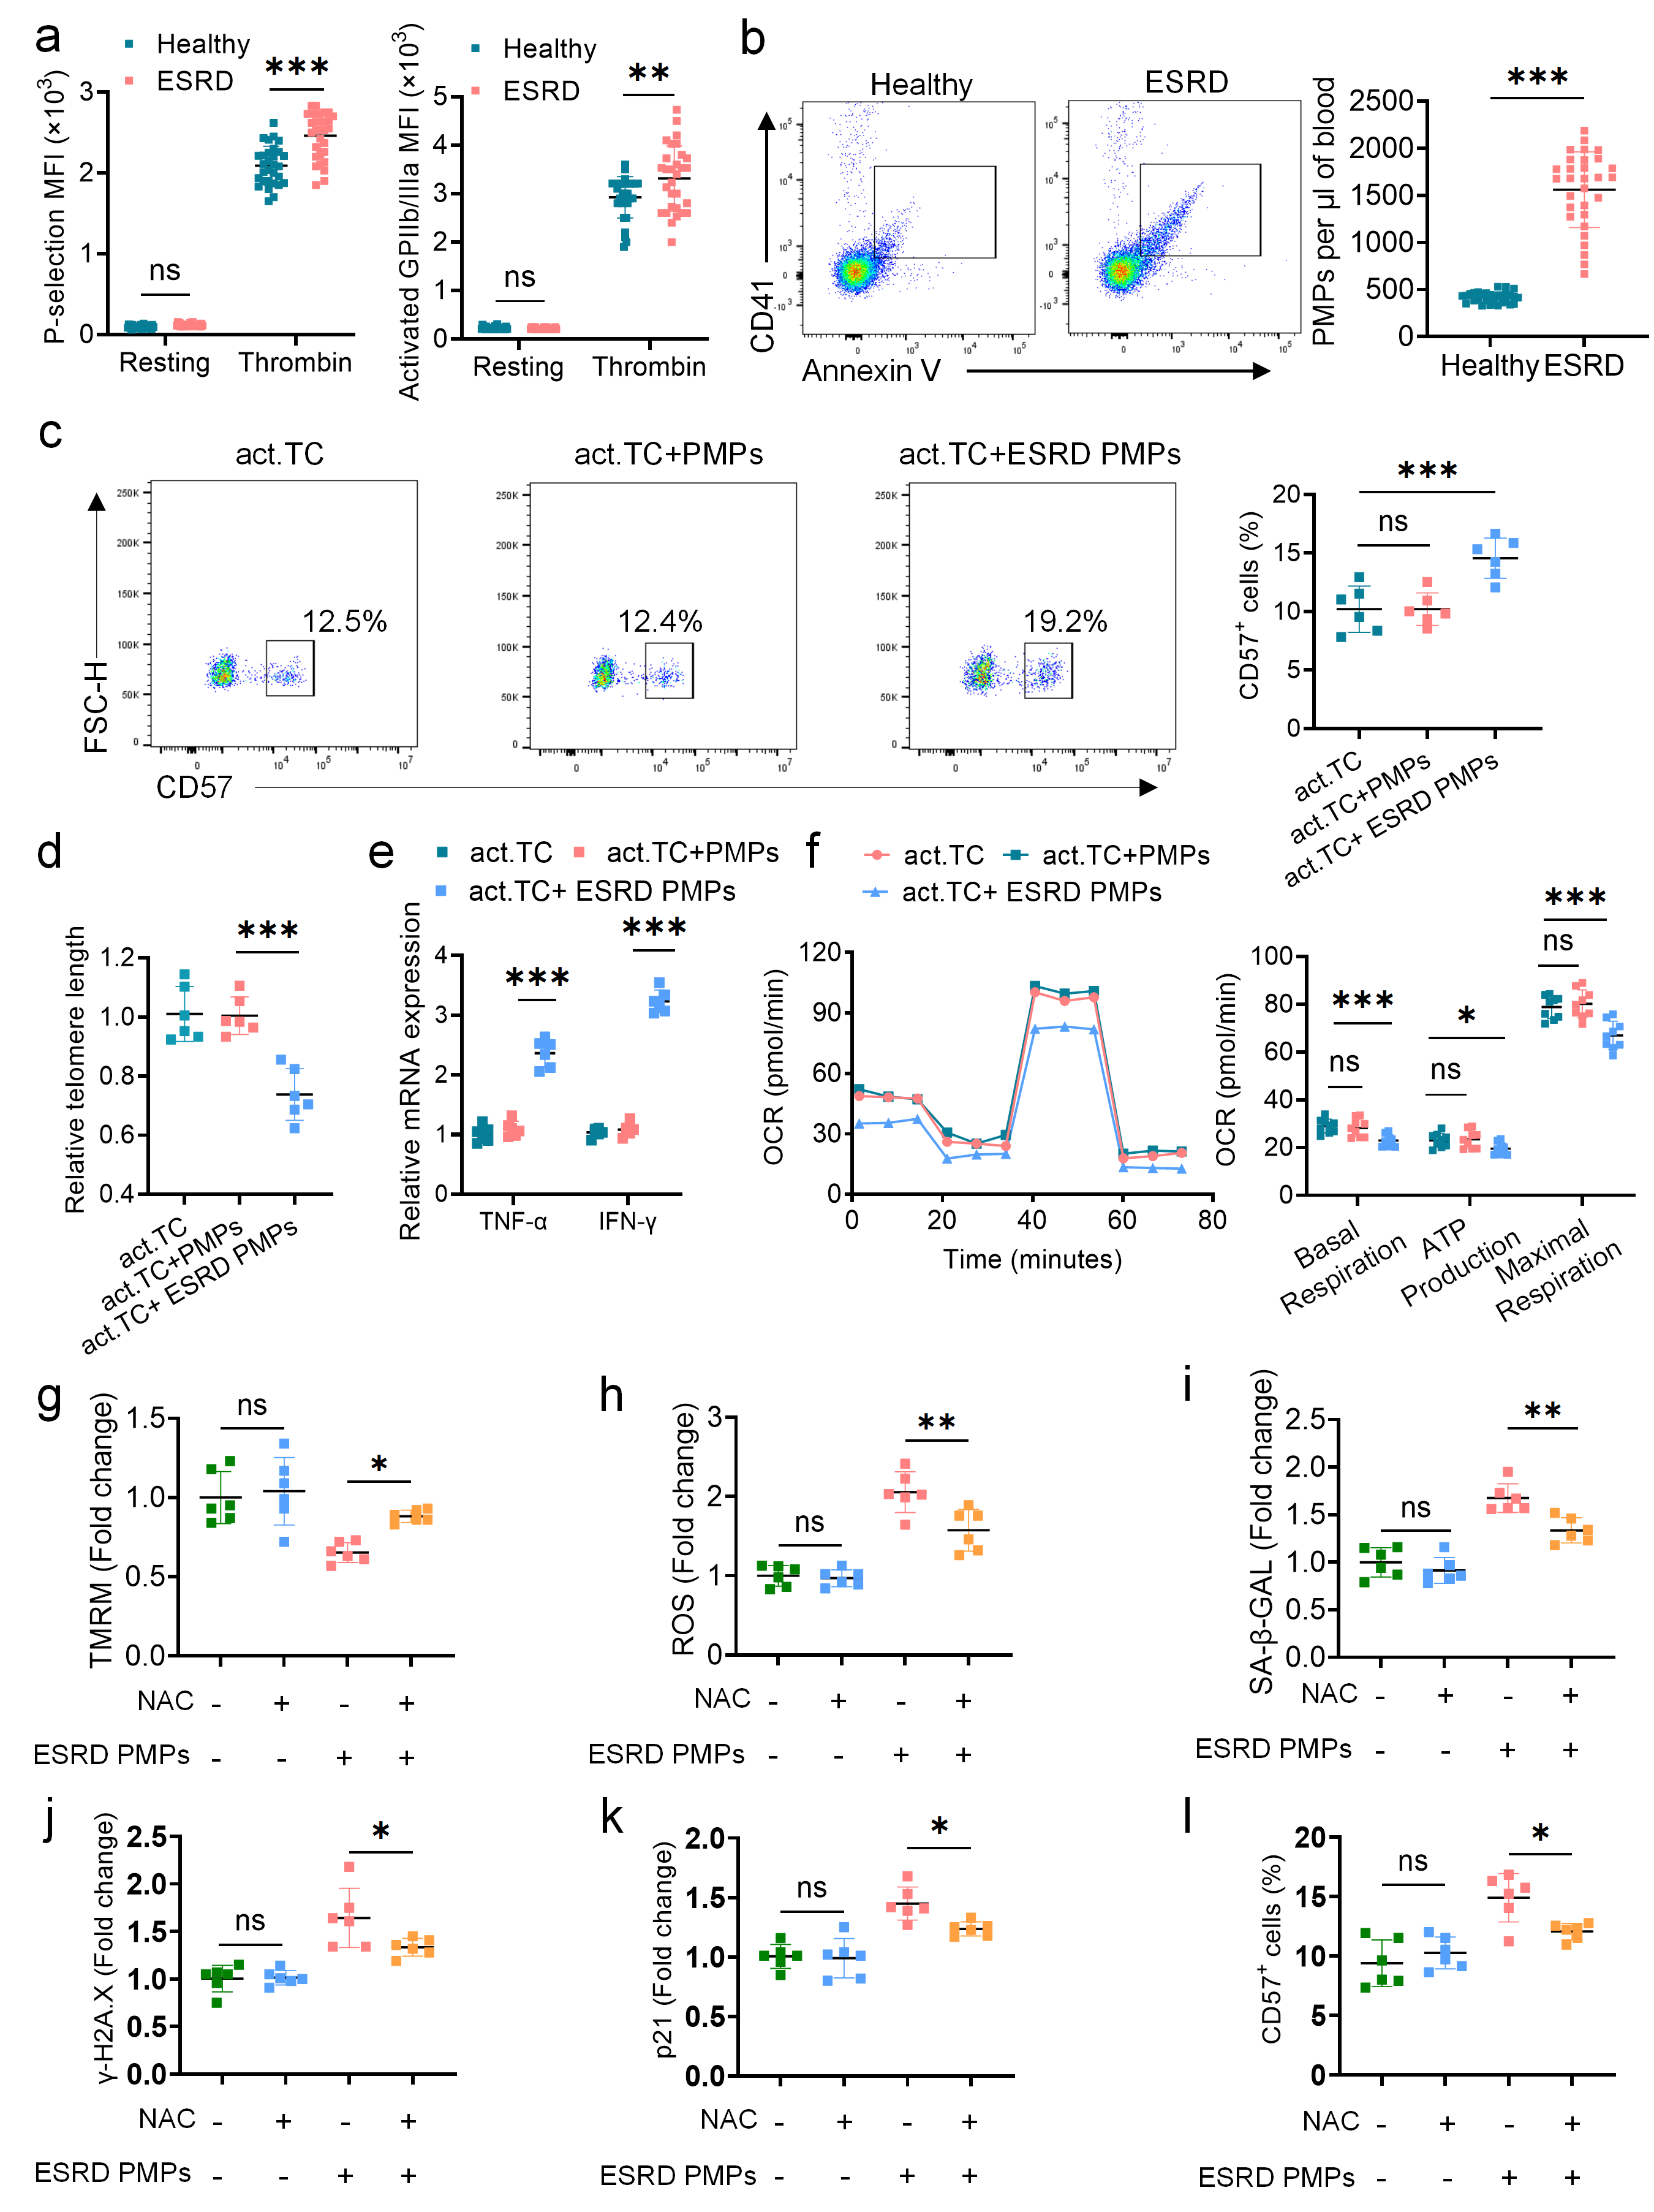
**

**Figure S4. PMPs mediate mitochondrial dysfunction and cellular senescence in CD8+ T cells.** (a) Flow cytometric analysis of P-selectin and activated GPIIb/IIIa expression in platelets from healthy controls or ESRD patients, either untreated or treated with 0.1 U/mL thrombin (n = 30 for each analysis). (b) Flow cytometric quantification of PMP concentration in whole blood, expressed as the number of PMPs per μL of whole blood from healthy controls or ESRD patients (n = 30). (c) Flow cytometric analysis of proportion of CD57⁺ cells in CD8⁺ T cells treated with PMPs from healthy controls or ESRD patients (n = 6). (d) Relative telomere length in CD8⁺ T cells treated with PMPs from healthy controls or ESRD patients (n = 6). (e) qPCR analysis of TNF-α and IFN-γ expression in CD8⁺ T cells treated with PMPs from healthy controls or ESRD patients (n = 6). (f) OCR in CD8⁺ T cells treated with PMPs from healthy controls or ESRD patients, with quantitation of basal respiration, ATP production, and maximal respiration (n = 9). (g-l) Flow cytometric analysis of TMRM levels (g), ROS levels (h), SA-β-Gal activity (i), γ-H2AX level (j), p21 expression (k) and proportion of CD57⁺ (l) cells in CD8⁺ T cell treated with PMPs from healthy controls or ESRD patients, with or without supplementation of 5 mM NAC (n = 6). Data are presented as mean ± SD and were analyzed by one-way ANOVA or 2-tailed, unpaired Student's t-test (a, b). *P < 0.05, **P < 0.01, ***P < 0.001.

Figure S5

**
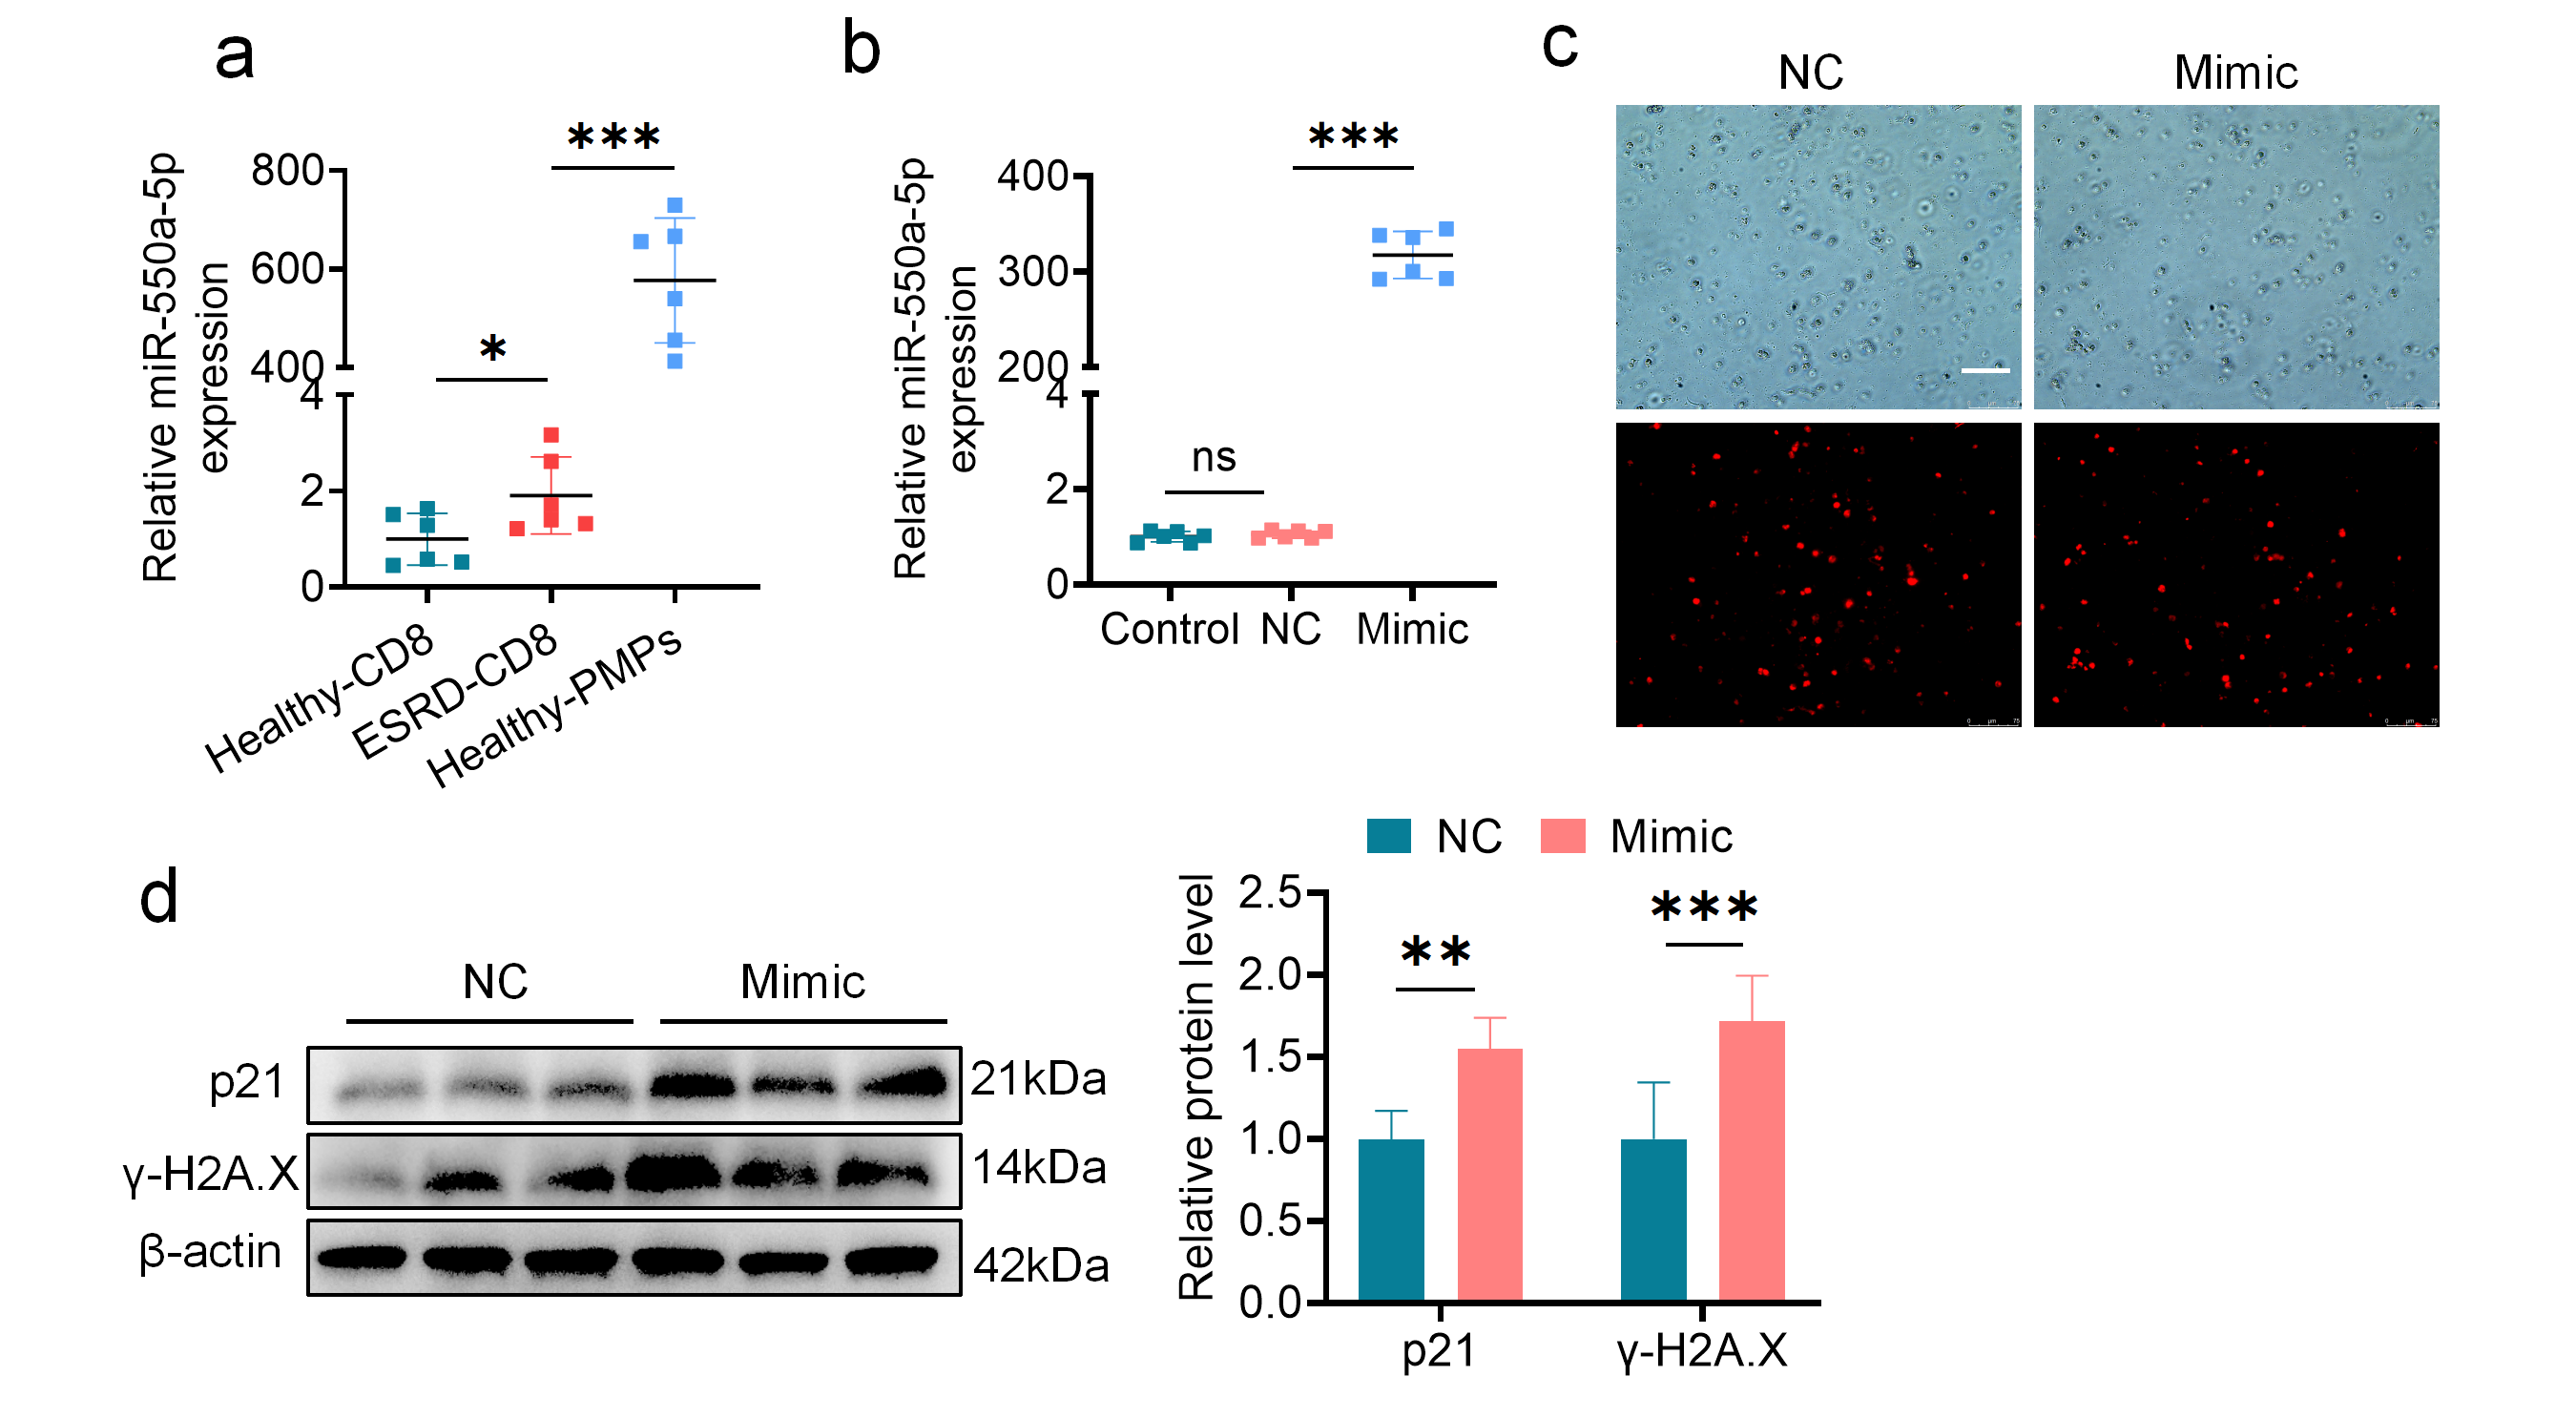
**

**Figure S5. MiR-550a-5p mimic treatment increases mitochondrial dysfunction and cellular senescence in CD8+ T cell.** (a) qPCR analysis of miR-550a-5p expression in CD8+ T cells of healthy controls and ESRD patients and and PMPs of healthy controls (n = 6). (b) qPCR analysis of miR-550a-5p expression in CD8+ T cells treated with miR-550a-5p mimic or control mimic (n = 6). (c) Representative fluorescence images of CD8⁺ T cells after 24 hours post-transfection. Scale bar, 75 μm. (d) Western blot analysis of γ-H2AX and p21 protein levels in CD8⁺ T cells treated with miR-550a-5p mimic or control mimic (n = 3). Data are presented as mean ± SD and were analyzed by one-way ANOVA or 2-tailed, unpaired Student's t-test (c). **P < 0.01, ***P < 0.001.

Figure S6


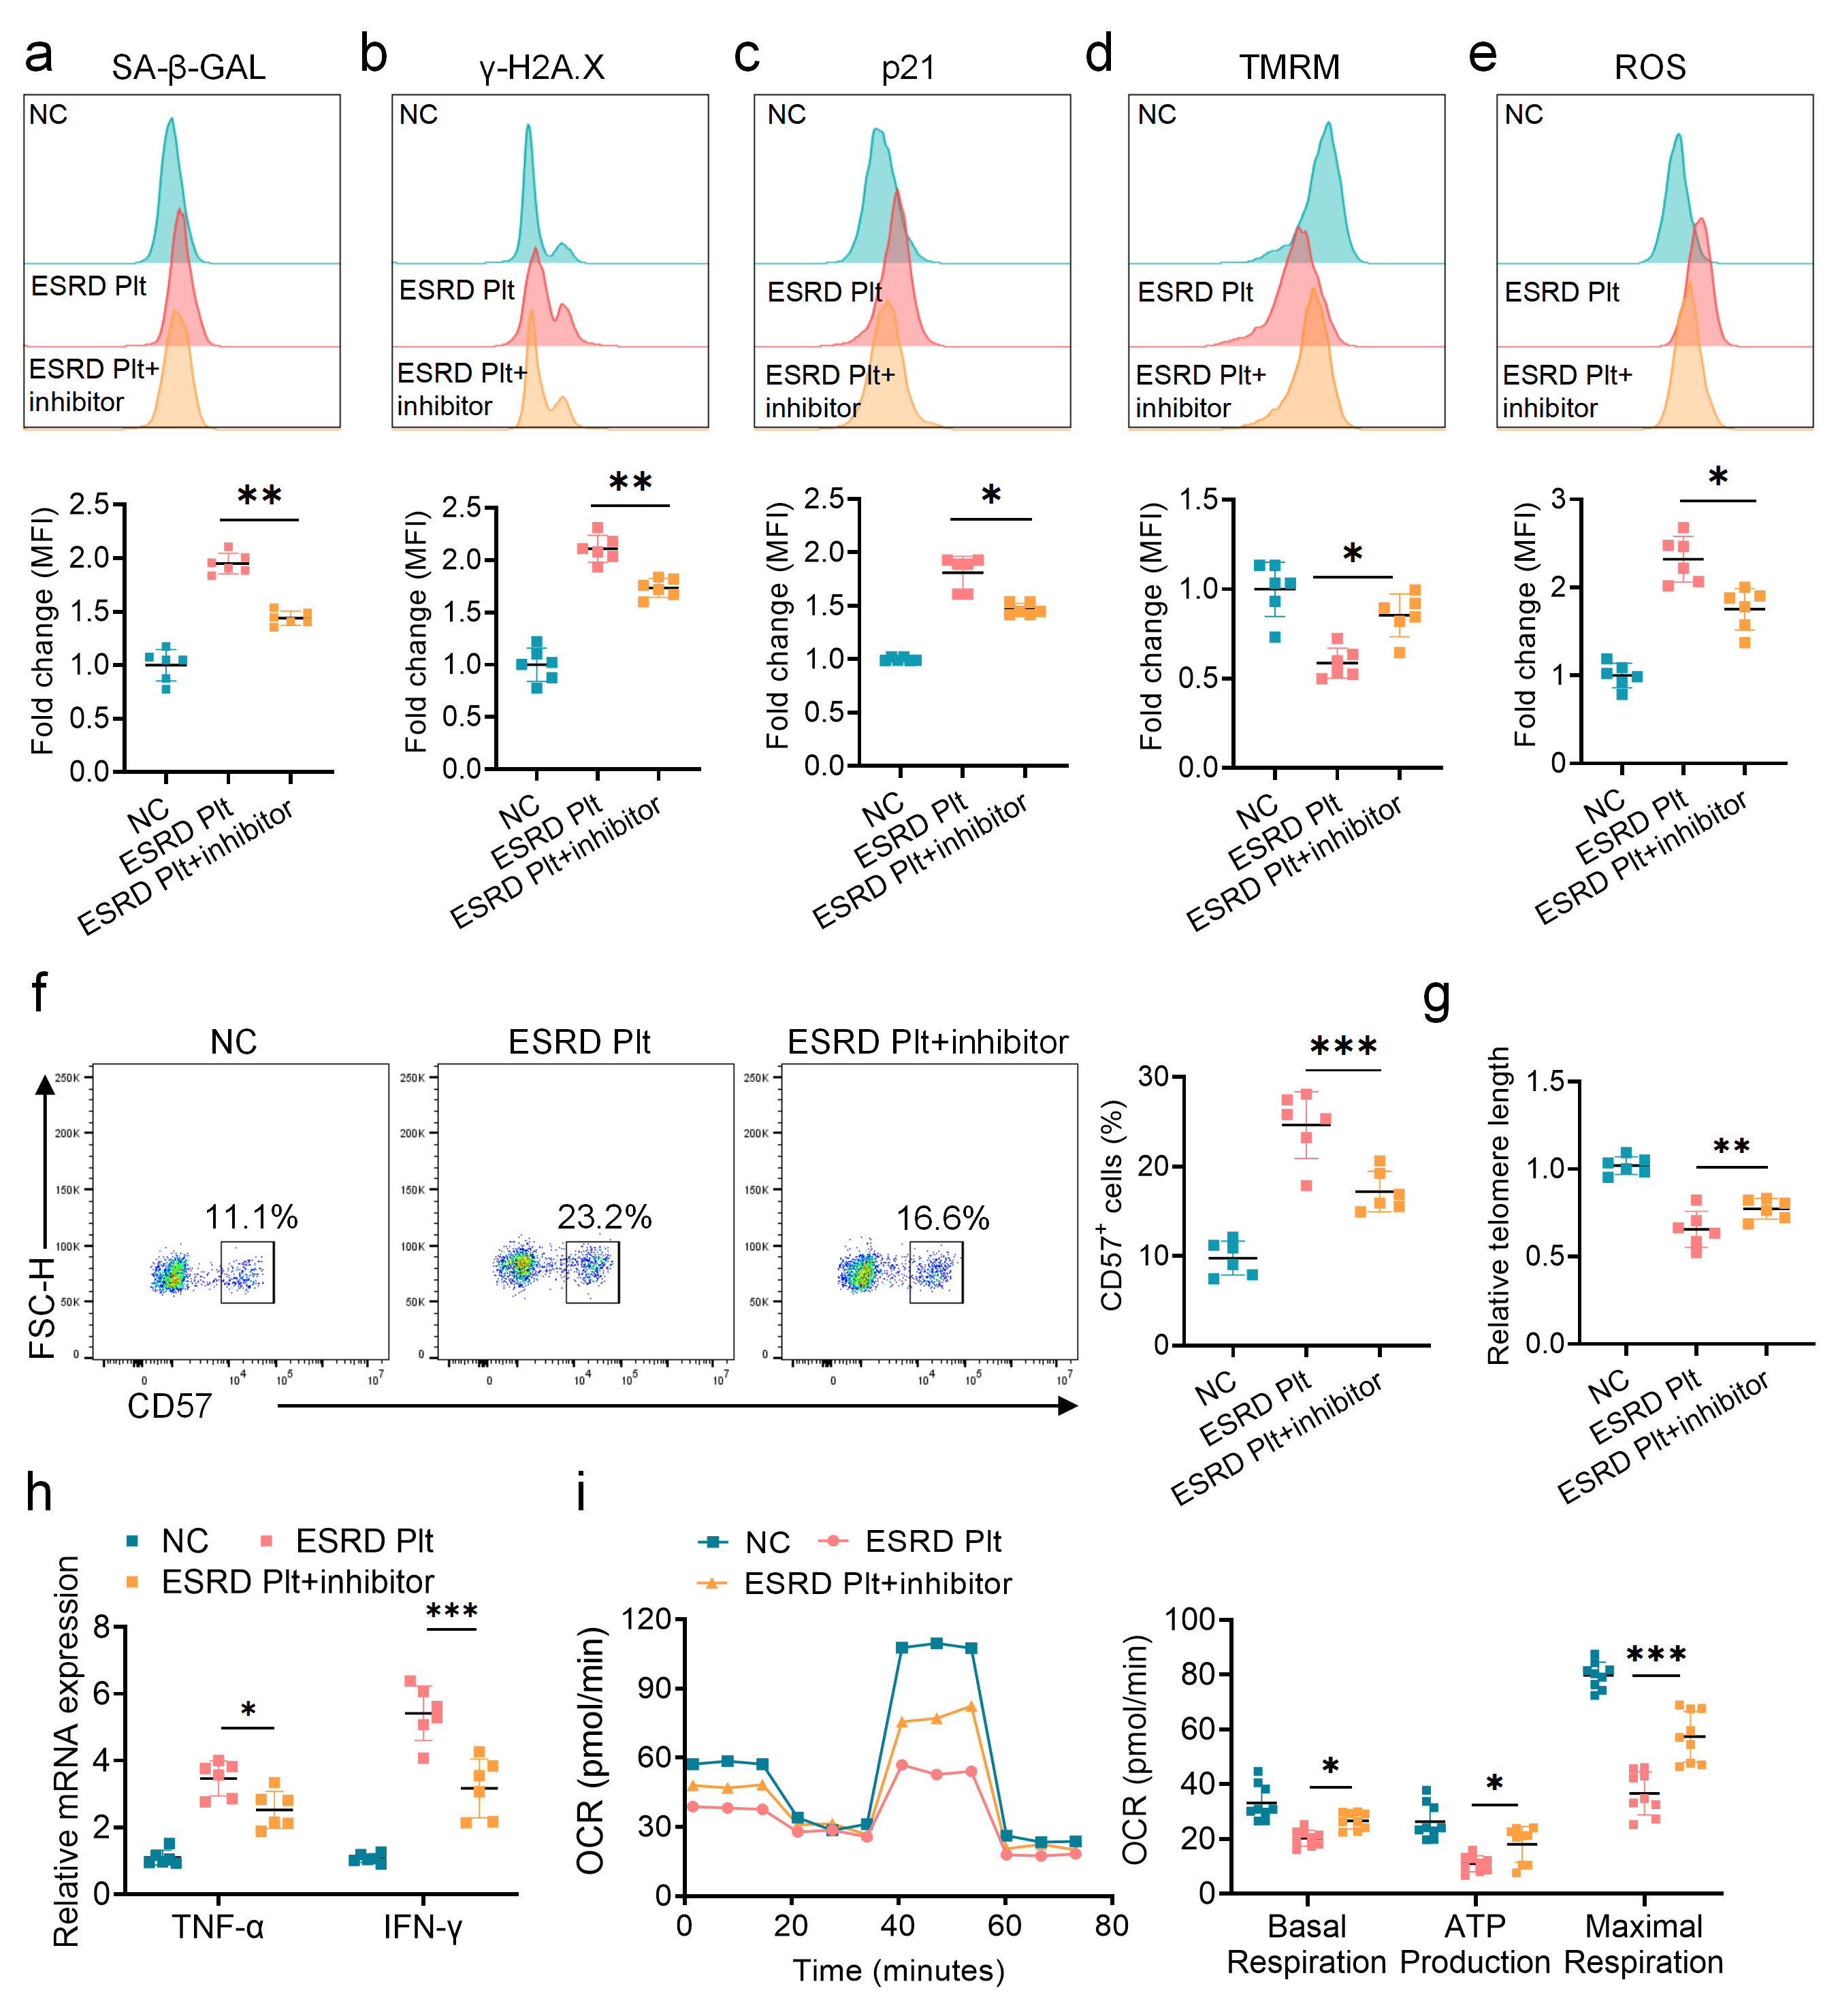


**Figure S6. miR-550a-5p inhibitor alleviates mitochondrial dysfunction and cellular senescence in CD8+ T cells induced by platelets from ESRD patients.** (a-i) Flow cytometric analysis of SA-β-Gal activity (a), γ-H2AX level (b), p21 expression (c), TMRM levels (d), ROS levels (e) and proportion of CD57⁺ cells (f) in CD8⁺ T cells treated with miR-550a-5p inhibitor or negative control under co-cultured system (n = 6). (g) Relative telomere length in CD8⁺ T cells treated with miR-550a-5p inhibitor or negative control under co-cultured system (n = 6). (h) qPCR analysis of TNF-α and IFN-γ expression in CD8⁺ T cells treated with miR-550a-5p inhibitor or negative control under co-cultured system (n = 6). (i) OCR in CD8⁺ T cells treated with miR-550a-5p inhibitor or negative control under co-cultured system, with quantitation of basal respiration, ATP production, and maximal respiration (n = 9). Data are presented as mean ± SD and were analyzed by one-way ANOVA. *P < 0.05, **P < 0.01, ***P < 0.001.

Figure S7


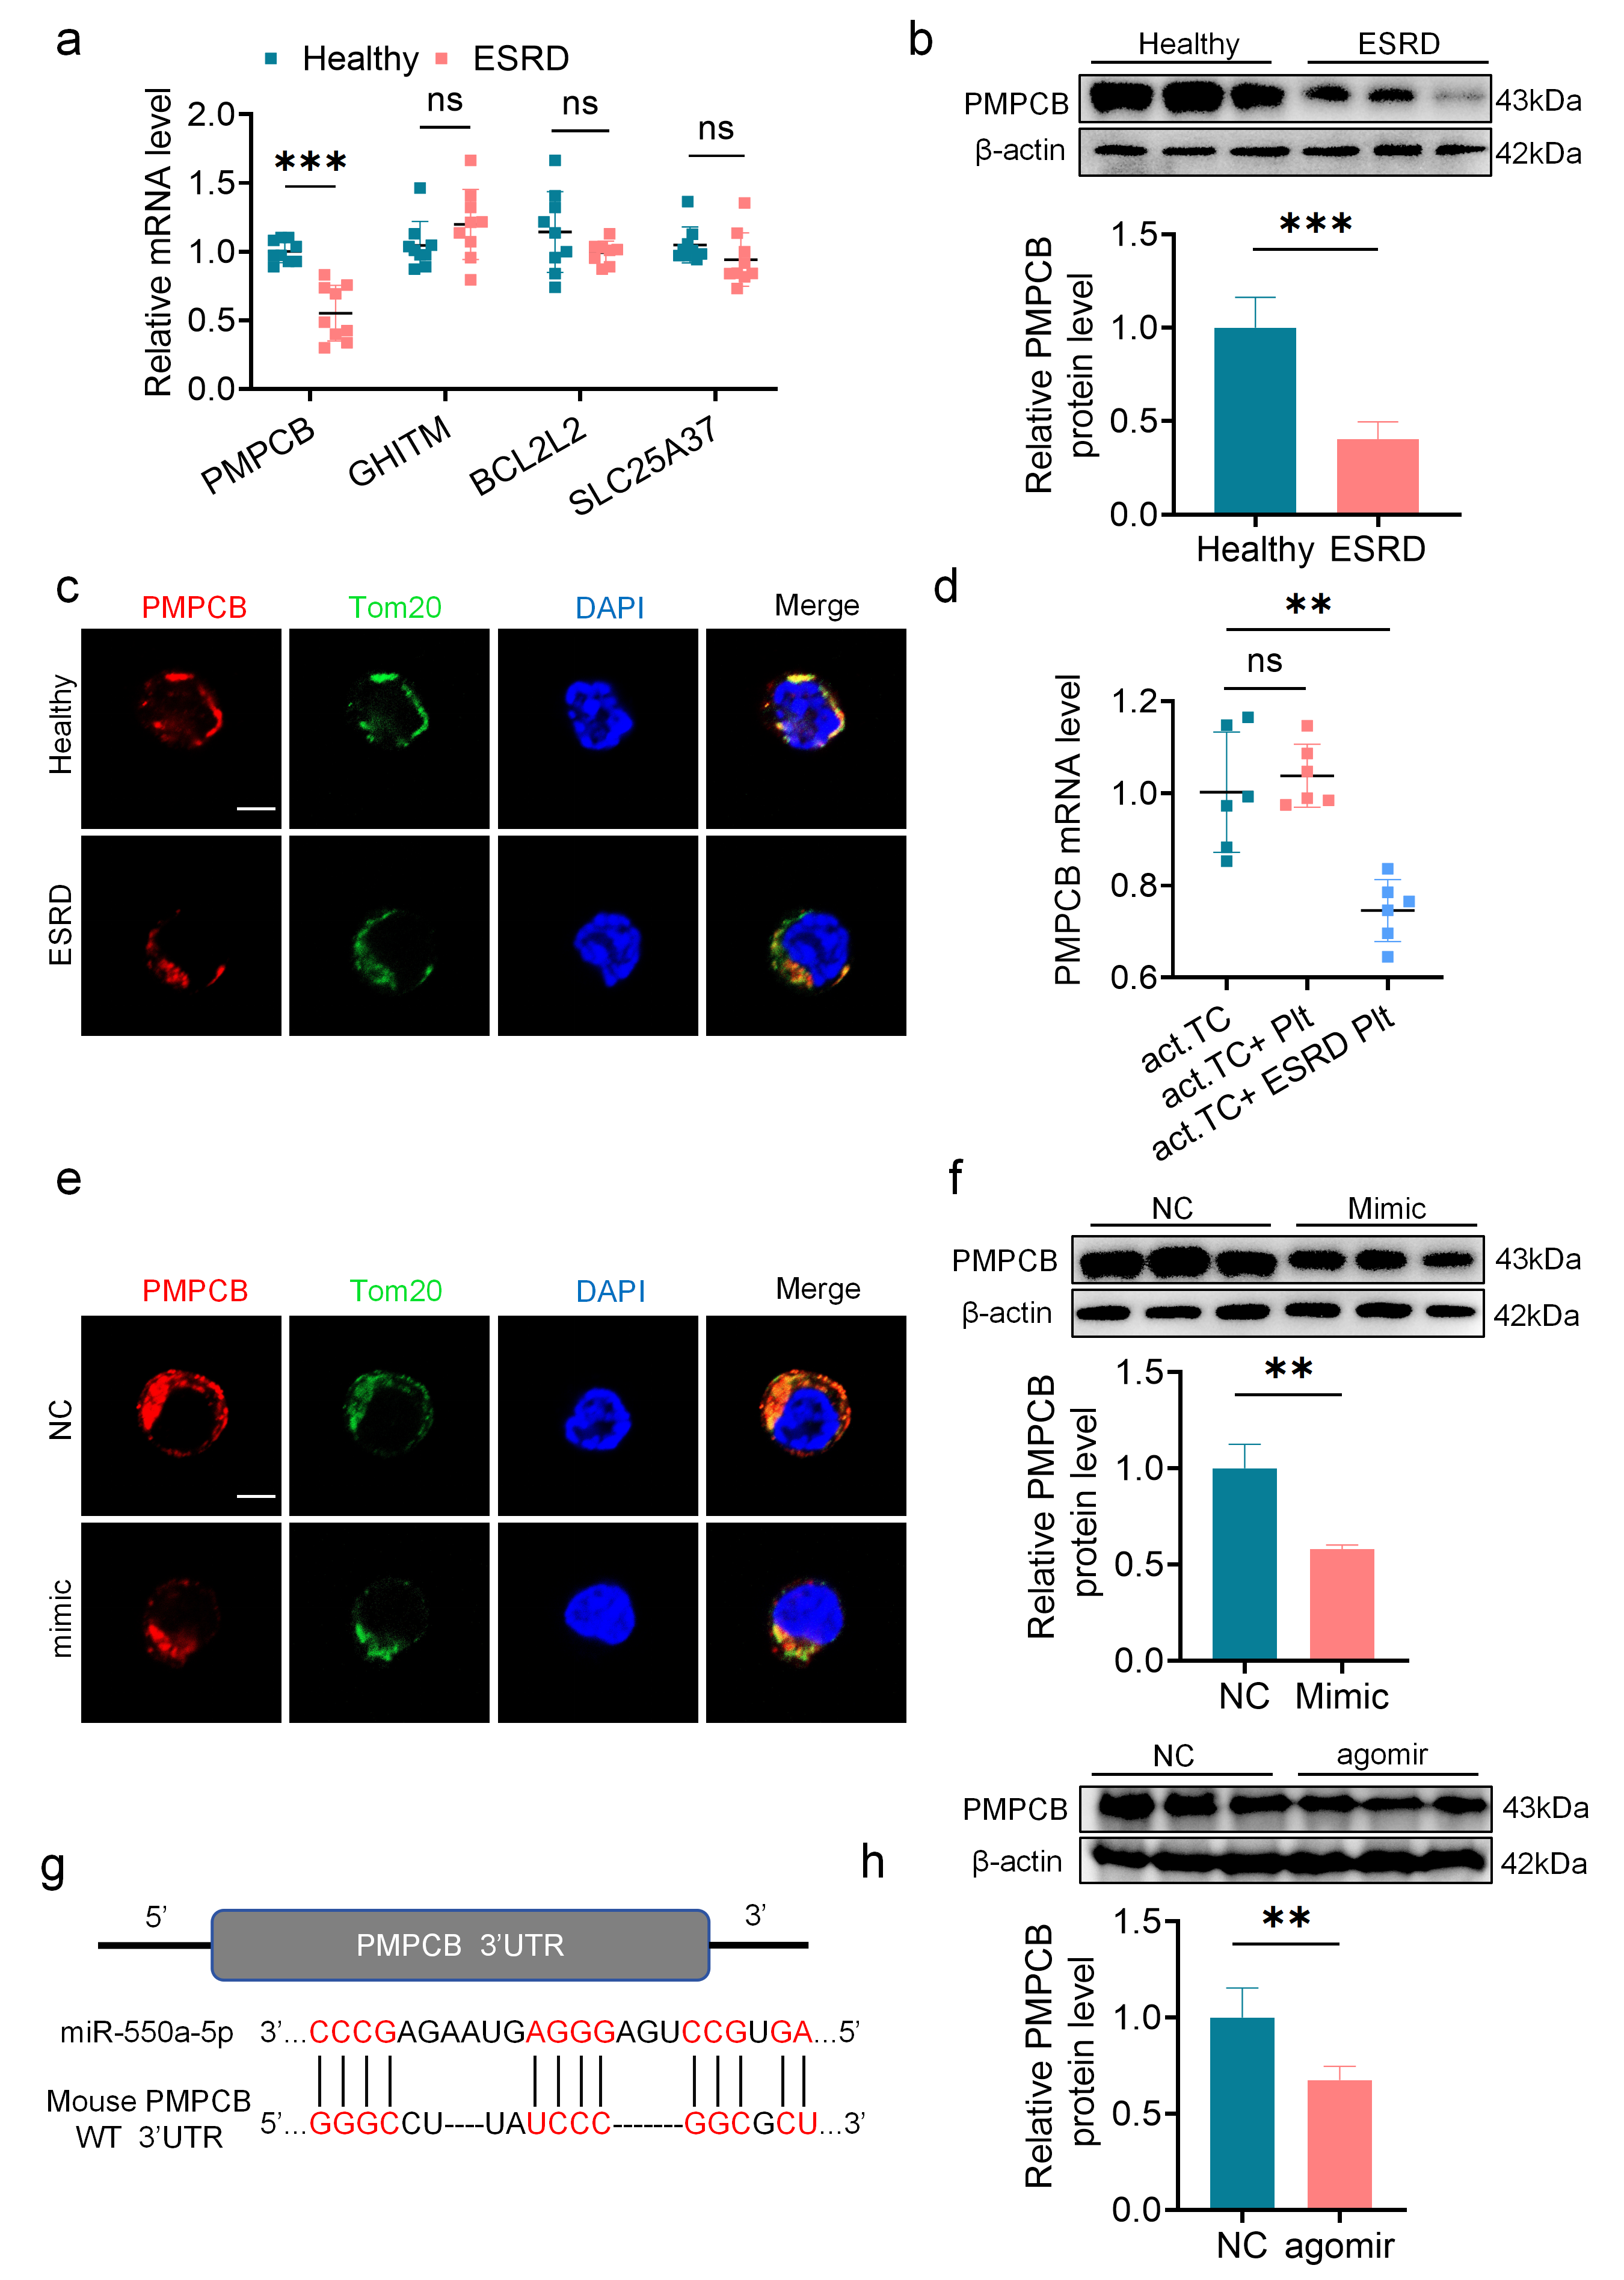


**Figure S7. MiR-550a-5p regulates PMPCB expression via directly binding to its 3’UTR region.** (a) qPCR analysis of expression levels of selected potential target genes of miR-550a-5p in CD8⁺ T cells of healthy controls and ESRD patients (n = 12). (b) Western blot analysis of PMPCB expression in CD8⁺ T cells of healthy controls and ESRD patients (n = 3). (c) Representative immunofluorescence staining images showing PMPCB expression (red) in CD8⁺ T cells of healthy controls and ESRD patients. Mitochondria were labeled with Tom20 (green). Scale bar, 10 μm. (d) qPCR analysis of PMPCB expression in CD8⁺ T cells co-cultured with platelets from healthy controls or ESRD patients (n = 6). (e) Representative immunofluorescence staining images showing PMPCB expression (red) in CD8⁺ T cells treated with or without miR-550a-5p mimic. Mitochondria were labeled with Tom20 (green). Scale bar, 10 μm. (f) Western blot analysis of PMPCB protein levels in CD8⁺ T cells treated with or without miR-550a-5p mimic (n = 3). (g) Schematic illustration of the putative miR-550a-5p binding sites within the 3′ untranslated region (UTR) of the mouse PMPCB gene. (h) Western blot analysis of the PMPCB protein levels in peripheral blood CD8⁺ T cells of mouse treated with or without miR-550a-5p agomir (n = 3). Data are presented as mean ± SD and were analyzed by 2-tailed, unpaired Student's t-test or one-way ANOVA (d). ns: no significance. **P < 0.01, ***P < 0.001.

Figure S8


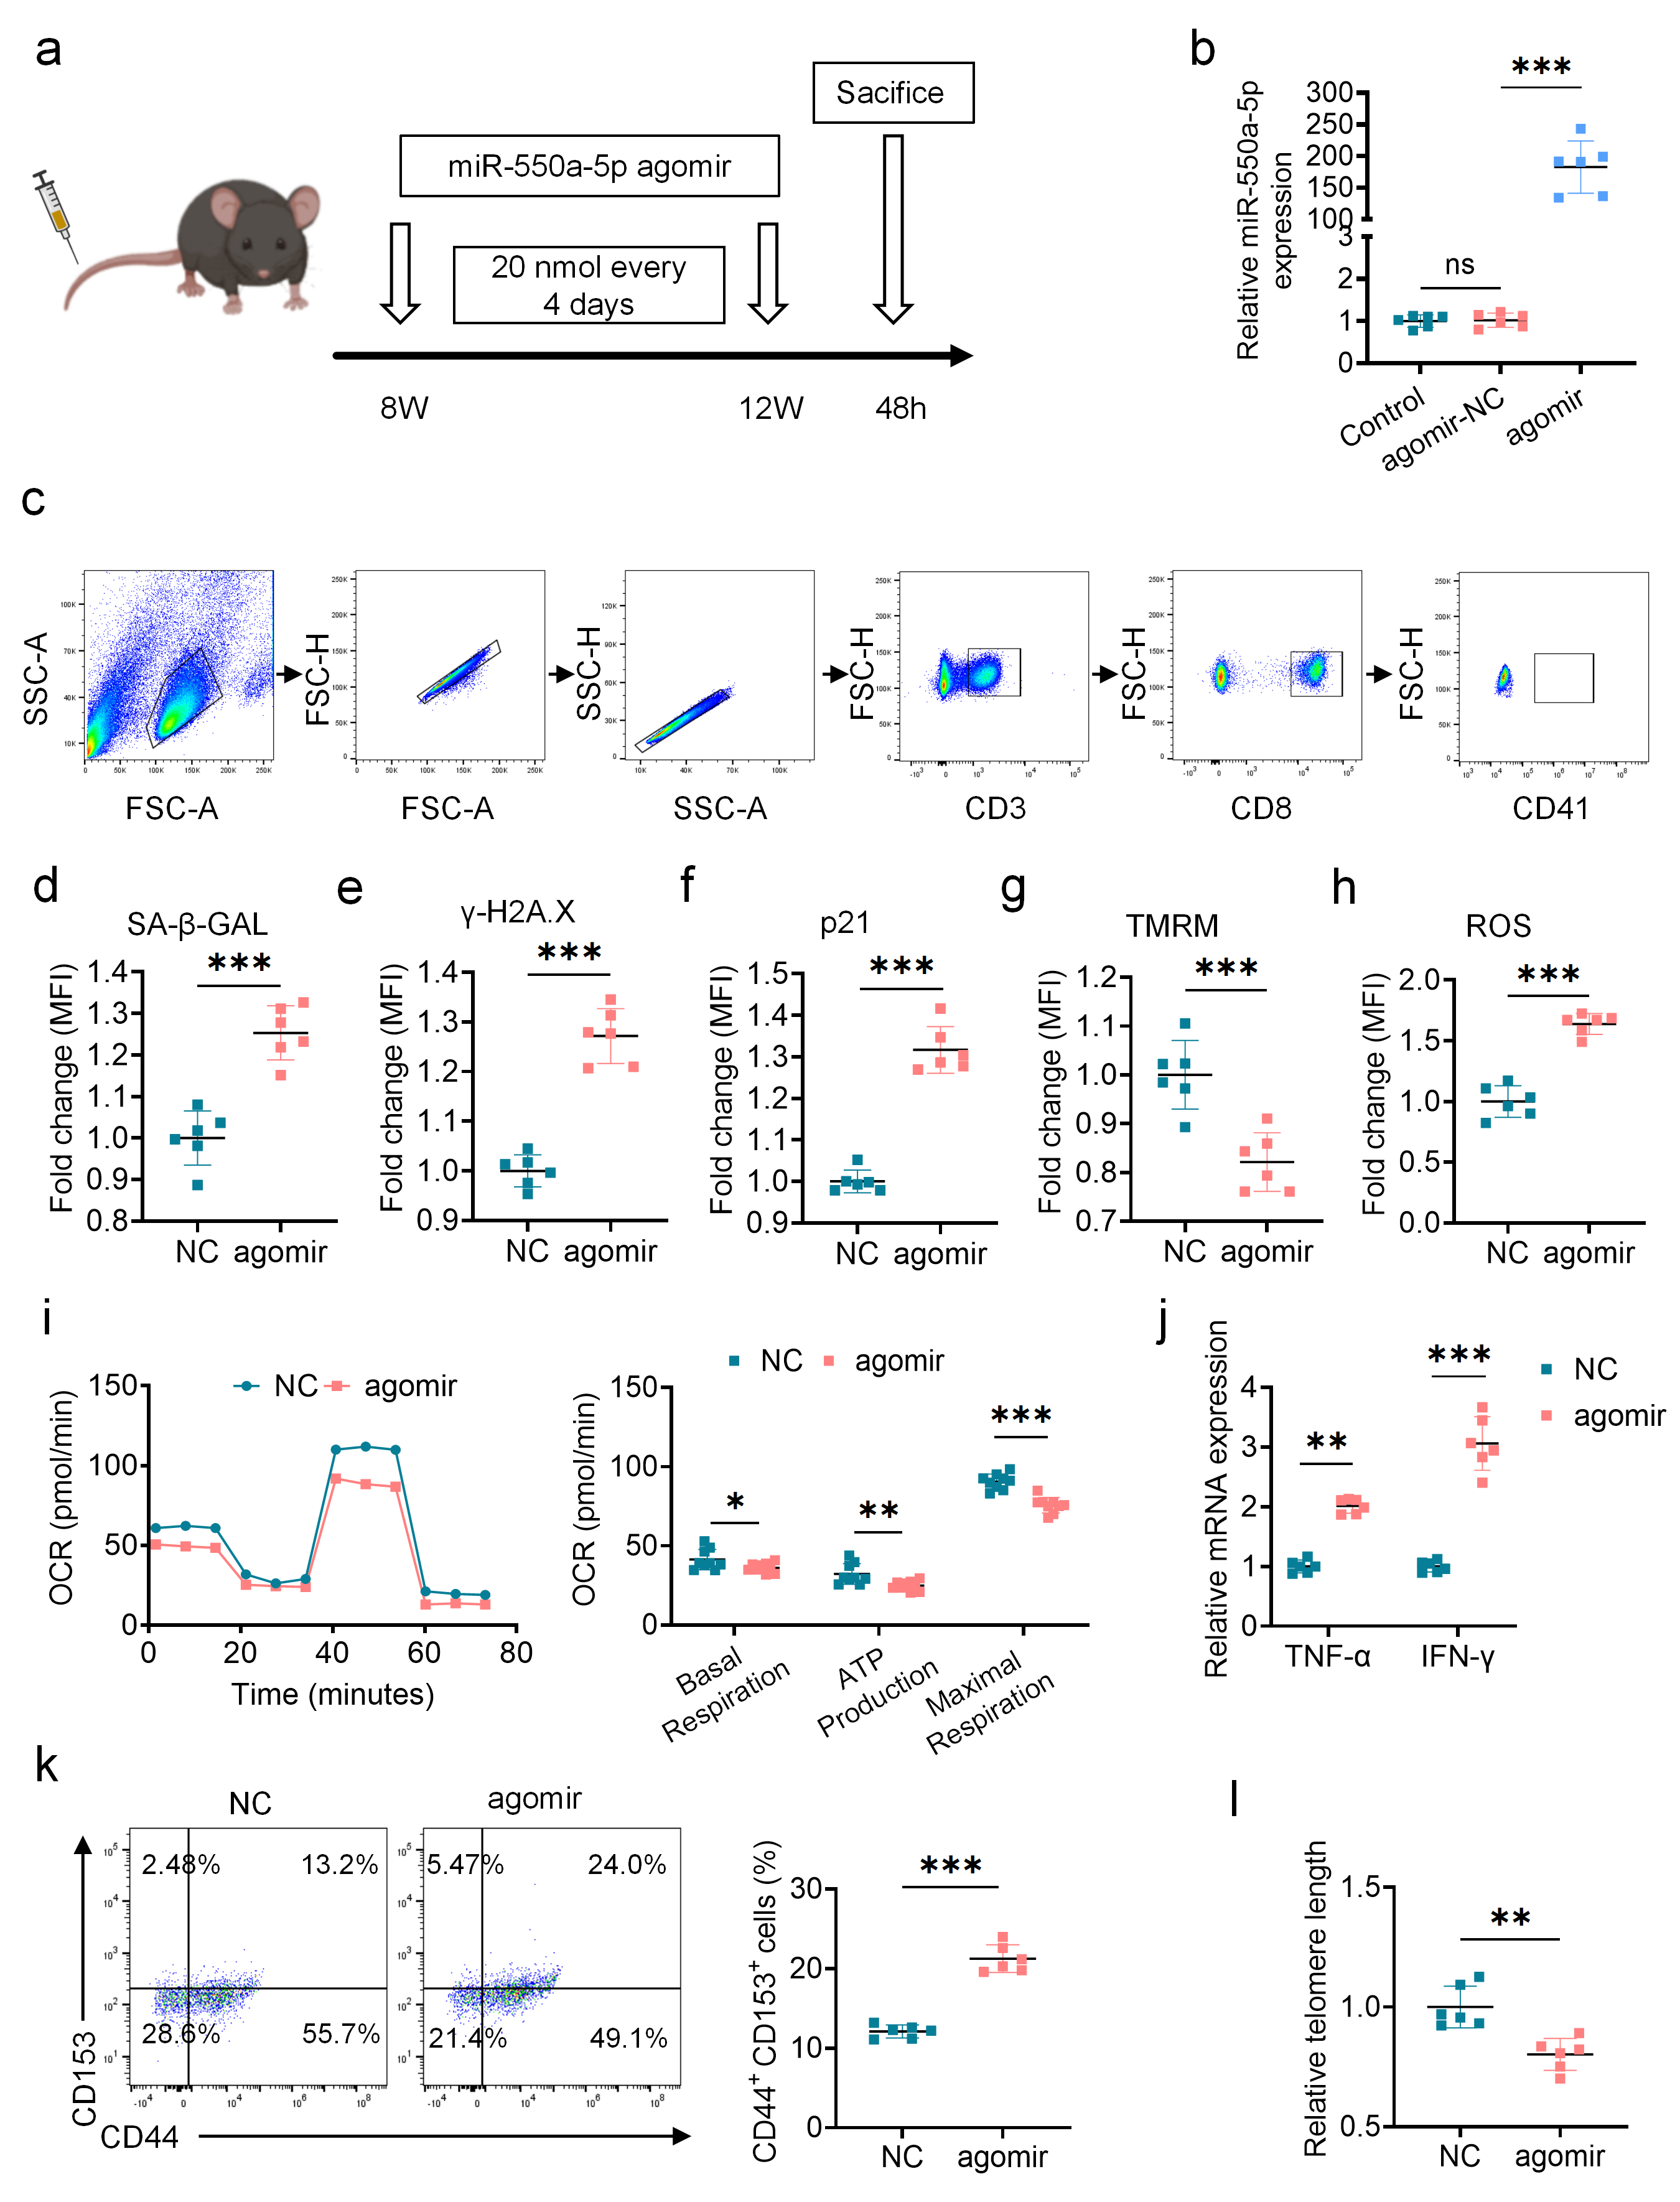


**Figure S8. MiR-550a-5p agomir treatment increases mitochondrial dysfunction and cellular senescence of CD8+ T cells in vivo.** (a)Experimental outline. Peripheral blood CD8⁺ T cells of mouse were harvested for functional assays. (b) qPCR analysis of miR-550a-5p expression in CD8+ T cells of mouse treated with miR-550a-5p agomir or negative control (n = 6).(c) Flow cytometric gating strategy for mouse lymphocyte subsets analysis. (d-h) Flow cytometric analysis of SA-β-Gal activity (d), γ-H2AX level (e), p21 expression (f), TMRM levels (g), and ROS levels (h) in CD8+ T cells of mouse treated with miR-550a-5p agomir or negative control (n = 6). (i) OCR in CD8+ T cells of mouse treated with miR-550a-5p agomir or negative control, with quantitation of basal respiration, ATP production, and maximal respiration (n = 9). (j) Flow cytometric analysis of the proportion of CD44+CD154+ cells in CD8+ T cells of mouse treated with miR-550a-5p agomir or negative control (n = 9). (k) qPCR analysis of TNF-α and IFN-γ expression in CD8+ T cells of mouse treated with miR-550a-5p agomir or negative control. (l) Relative telomere length (L) in CD8+ T cells of mouse treated with miR-550a-5p agomir or negative control (n = 6). Data are presented as mean ± SD and were analyzed by 2-tailed, unpaired Student's t-test or one-way ANOVA (b). ns: no significance. *P < 0.05, **P < 0.01, ***P < 0.001.

Figure S9


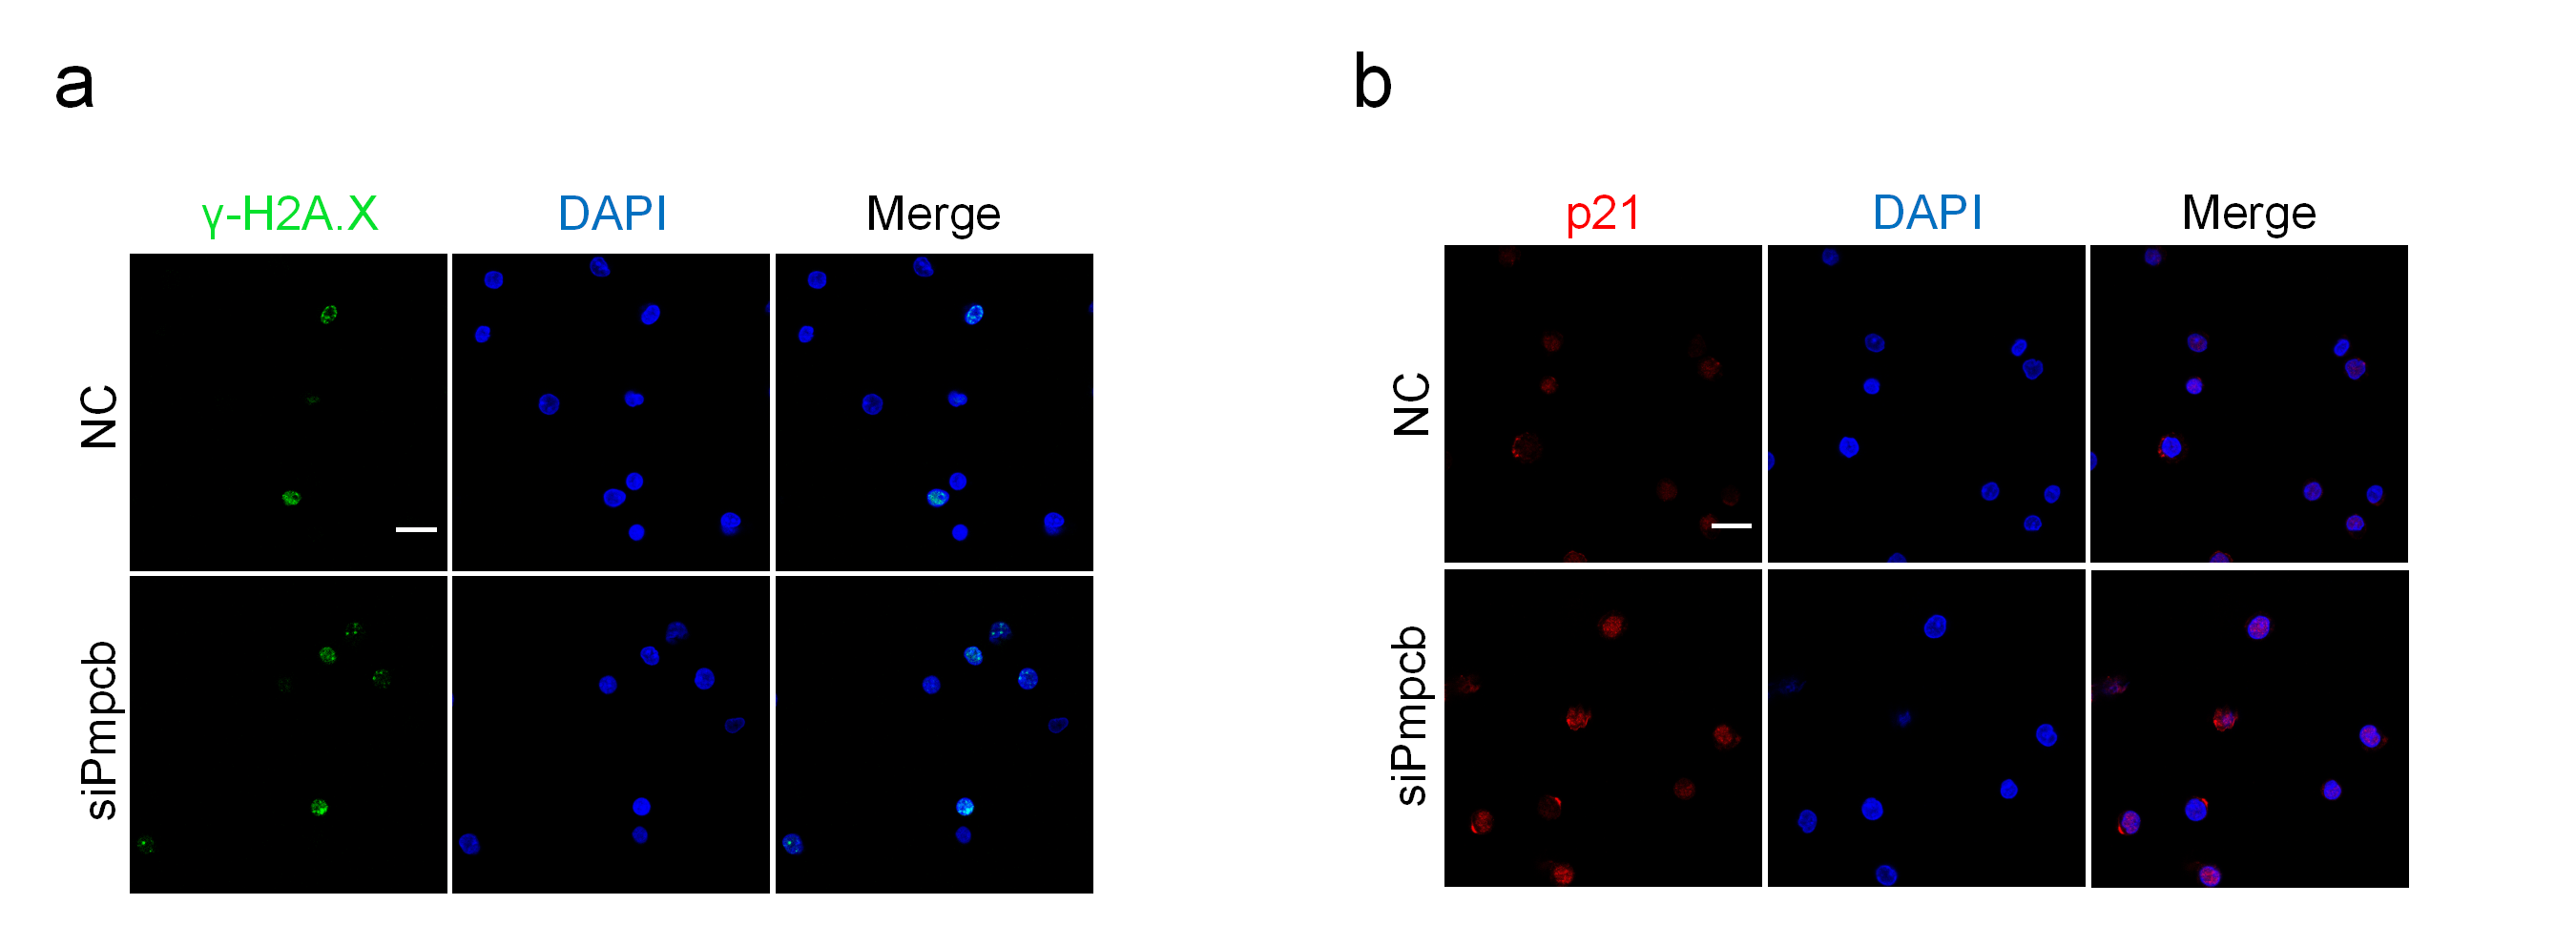


**Figure S9. Knockown of PMPCB induces cellular senescence in CD8+ T cells.** (a, b) Representative immunofluorescence staining images showing γ-H2A.X level (a) and p21 expression (b) in CD8⁺ T cells treated with PMPCB-specific siRNA or control siRNA. Scale bar, 20 μm.

Figure S10


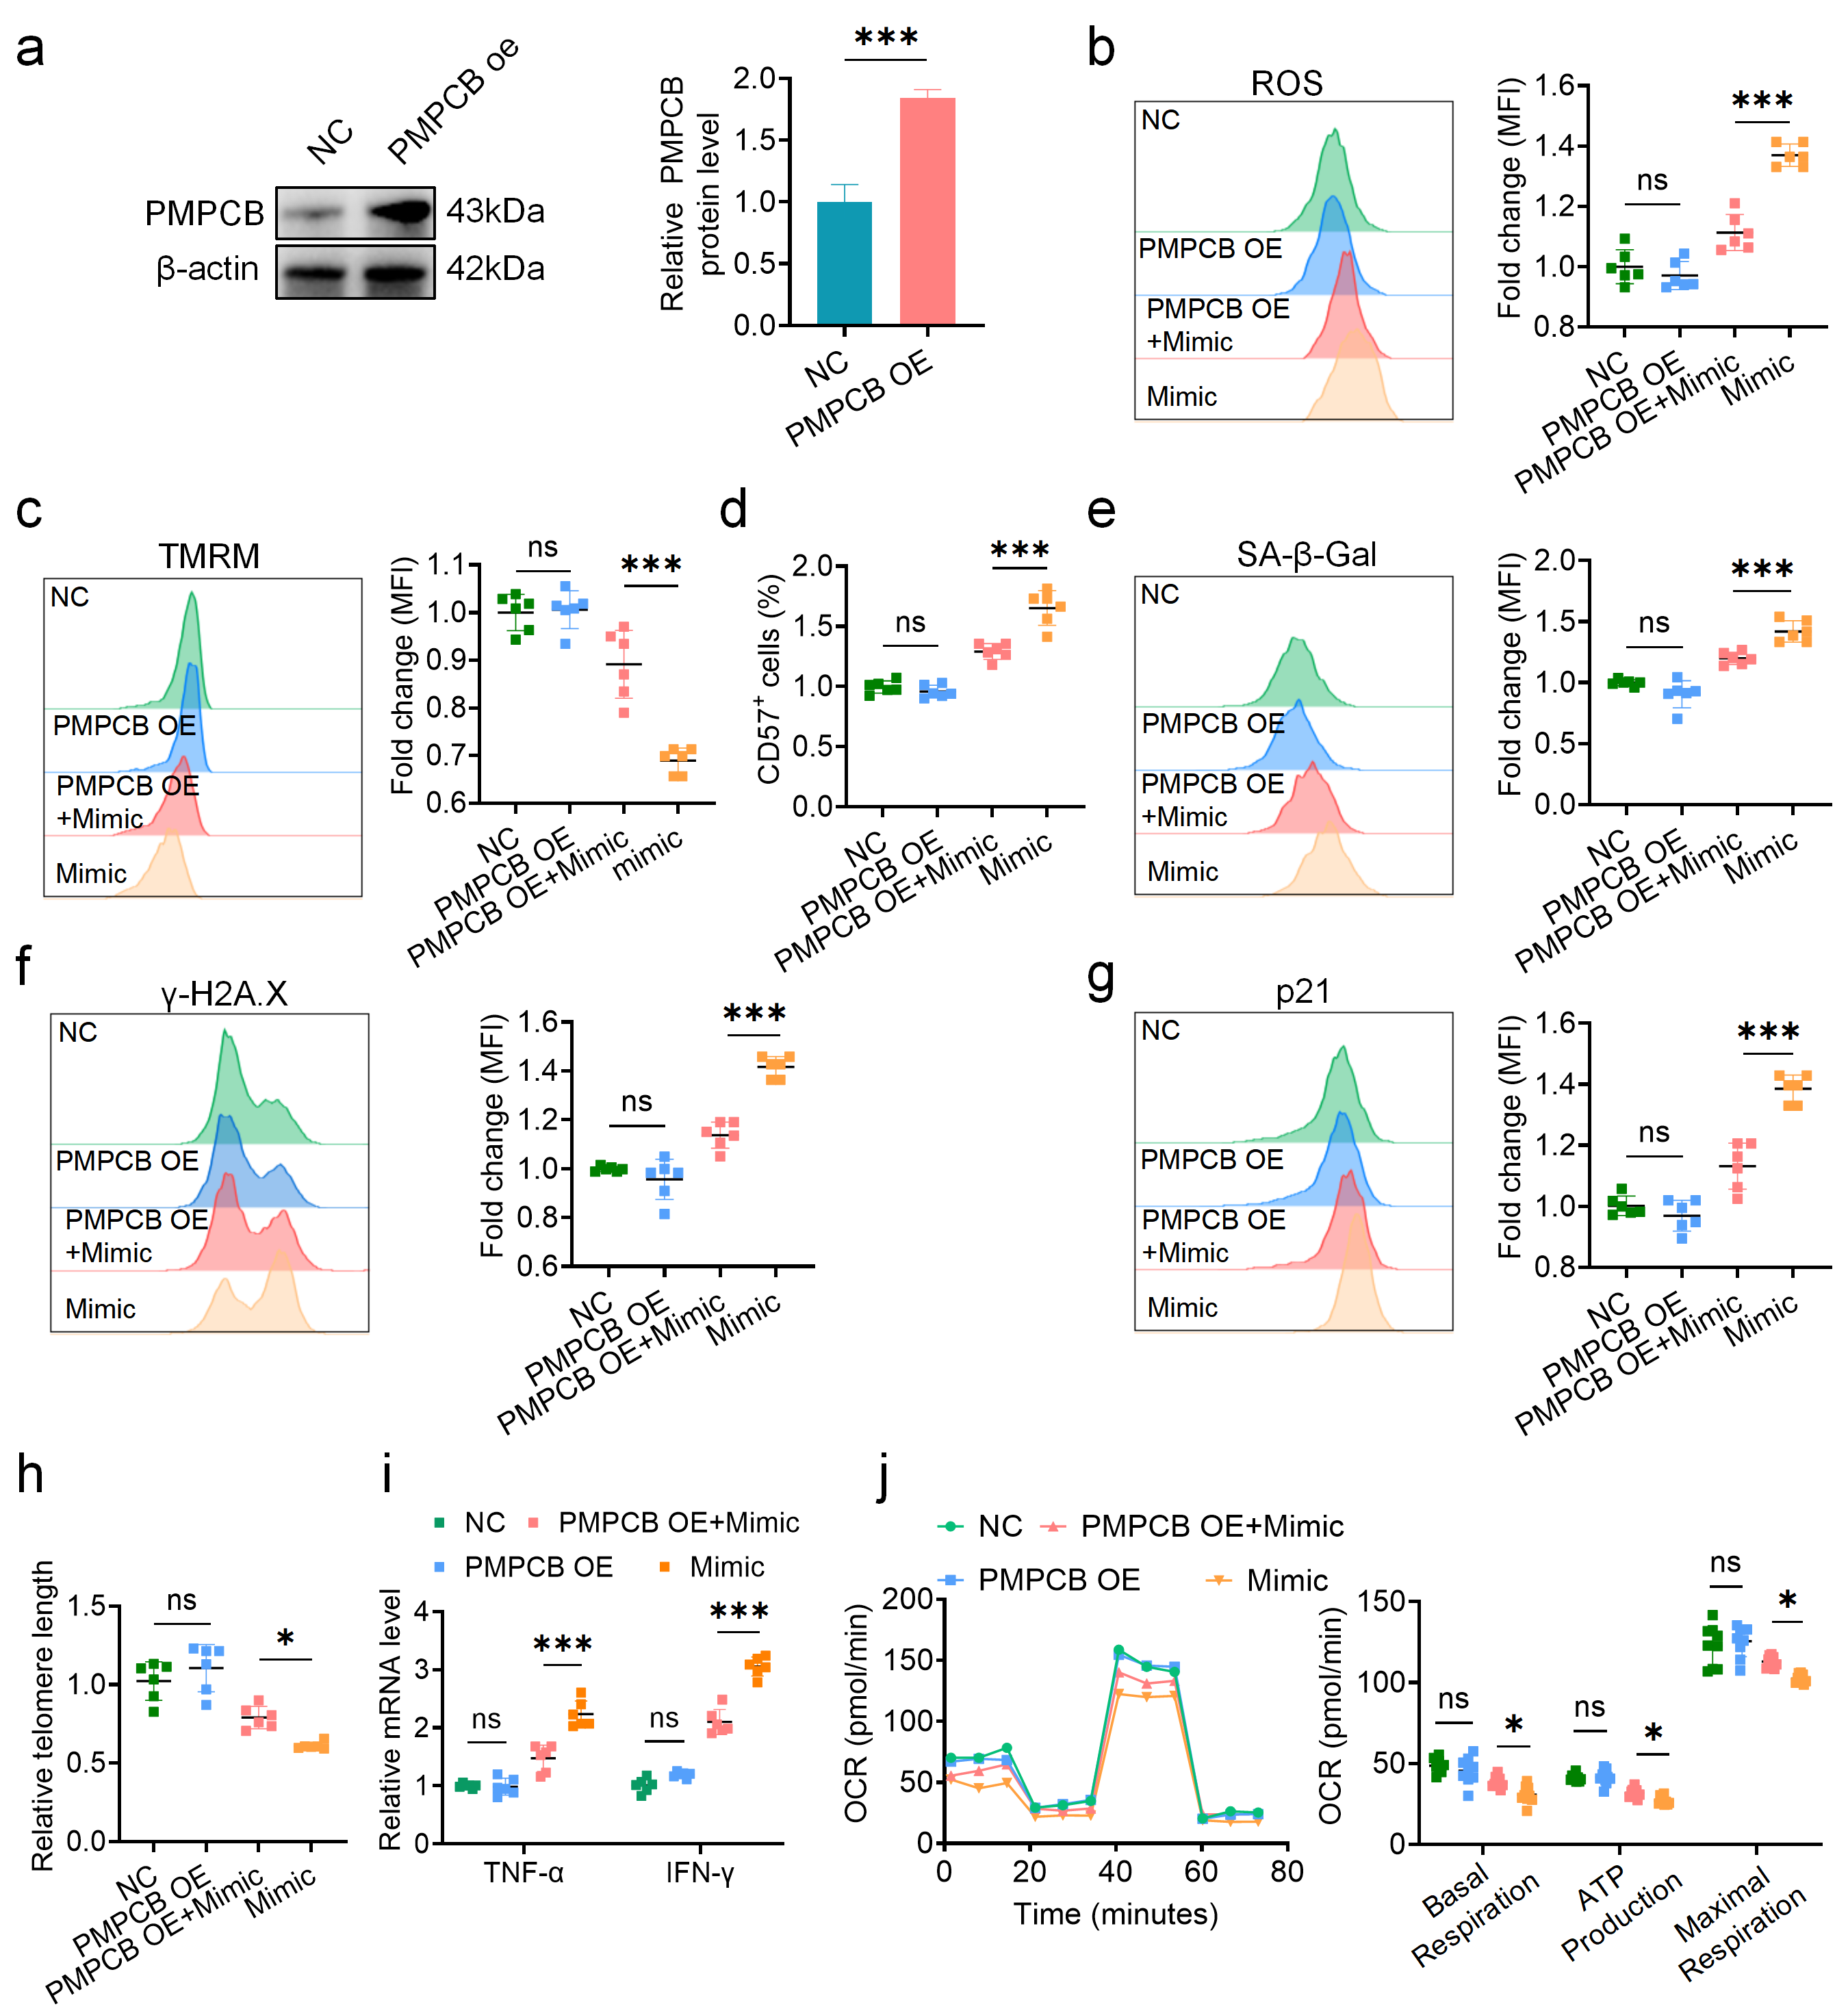


**Figure S10. PMPCB overexpression improves miR-550a-5p-induced mitochondrial dysfunction and cellular senescence in CD8+ T cells.** (a) Western blot analysis of PMPCB protein levels in CD8⁺ T cells transfected with PMPCB overexpression plasmid or control plasmid (n = 3). (b–g) Flow cytometric analysis of ROS levels (b), TMRM levles (c), proportion of CD57⁺ cells (d), SA-β-Gal activity (e), γ-H2AX level (f), p21 expression (g) in CD8⁺ T cells co-transfected with PMPCB overexpression plasmid and miR-550a-5p mimic (n = 6). (h) Relative telomere length in CD8⁺ T cells co-transfected with PMPCB overexpression plasmid and miR-550a-5p mimic (n = 6). (i) qPCR analysis of TNF-α and IFN-γ expression in CD8⁺ T cells co-transfected with PMPCB overexpression plasmid and miR-550a-5p mimic (n = 6). (j) OCR in CD8⁺ T cells co-transfected with PMPCB overexpression plasmid and miR-550a-5p mimic (n = 6), with quantitation of basal respiration, ATP production, and maximal respiration (n = 9). Data are presented as mean ± SD and were analyzed by one-way ANOVA or 2-tailed, unpaired Student's t-test (a). *P < 0.05, ***P < 0.001.

Figure S11

**
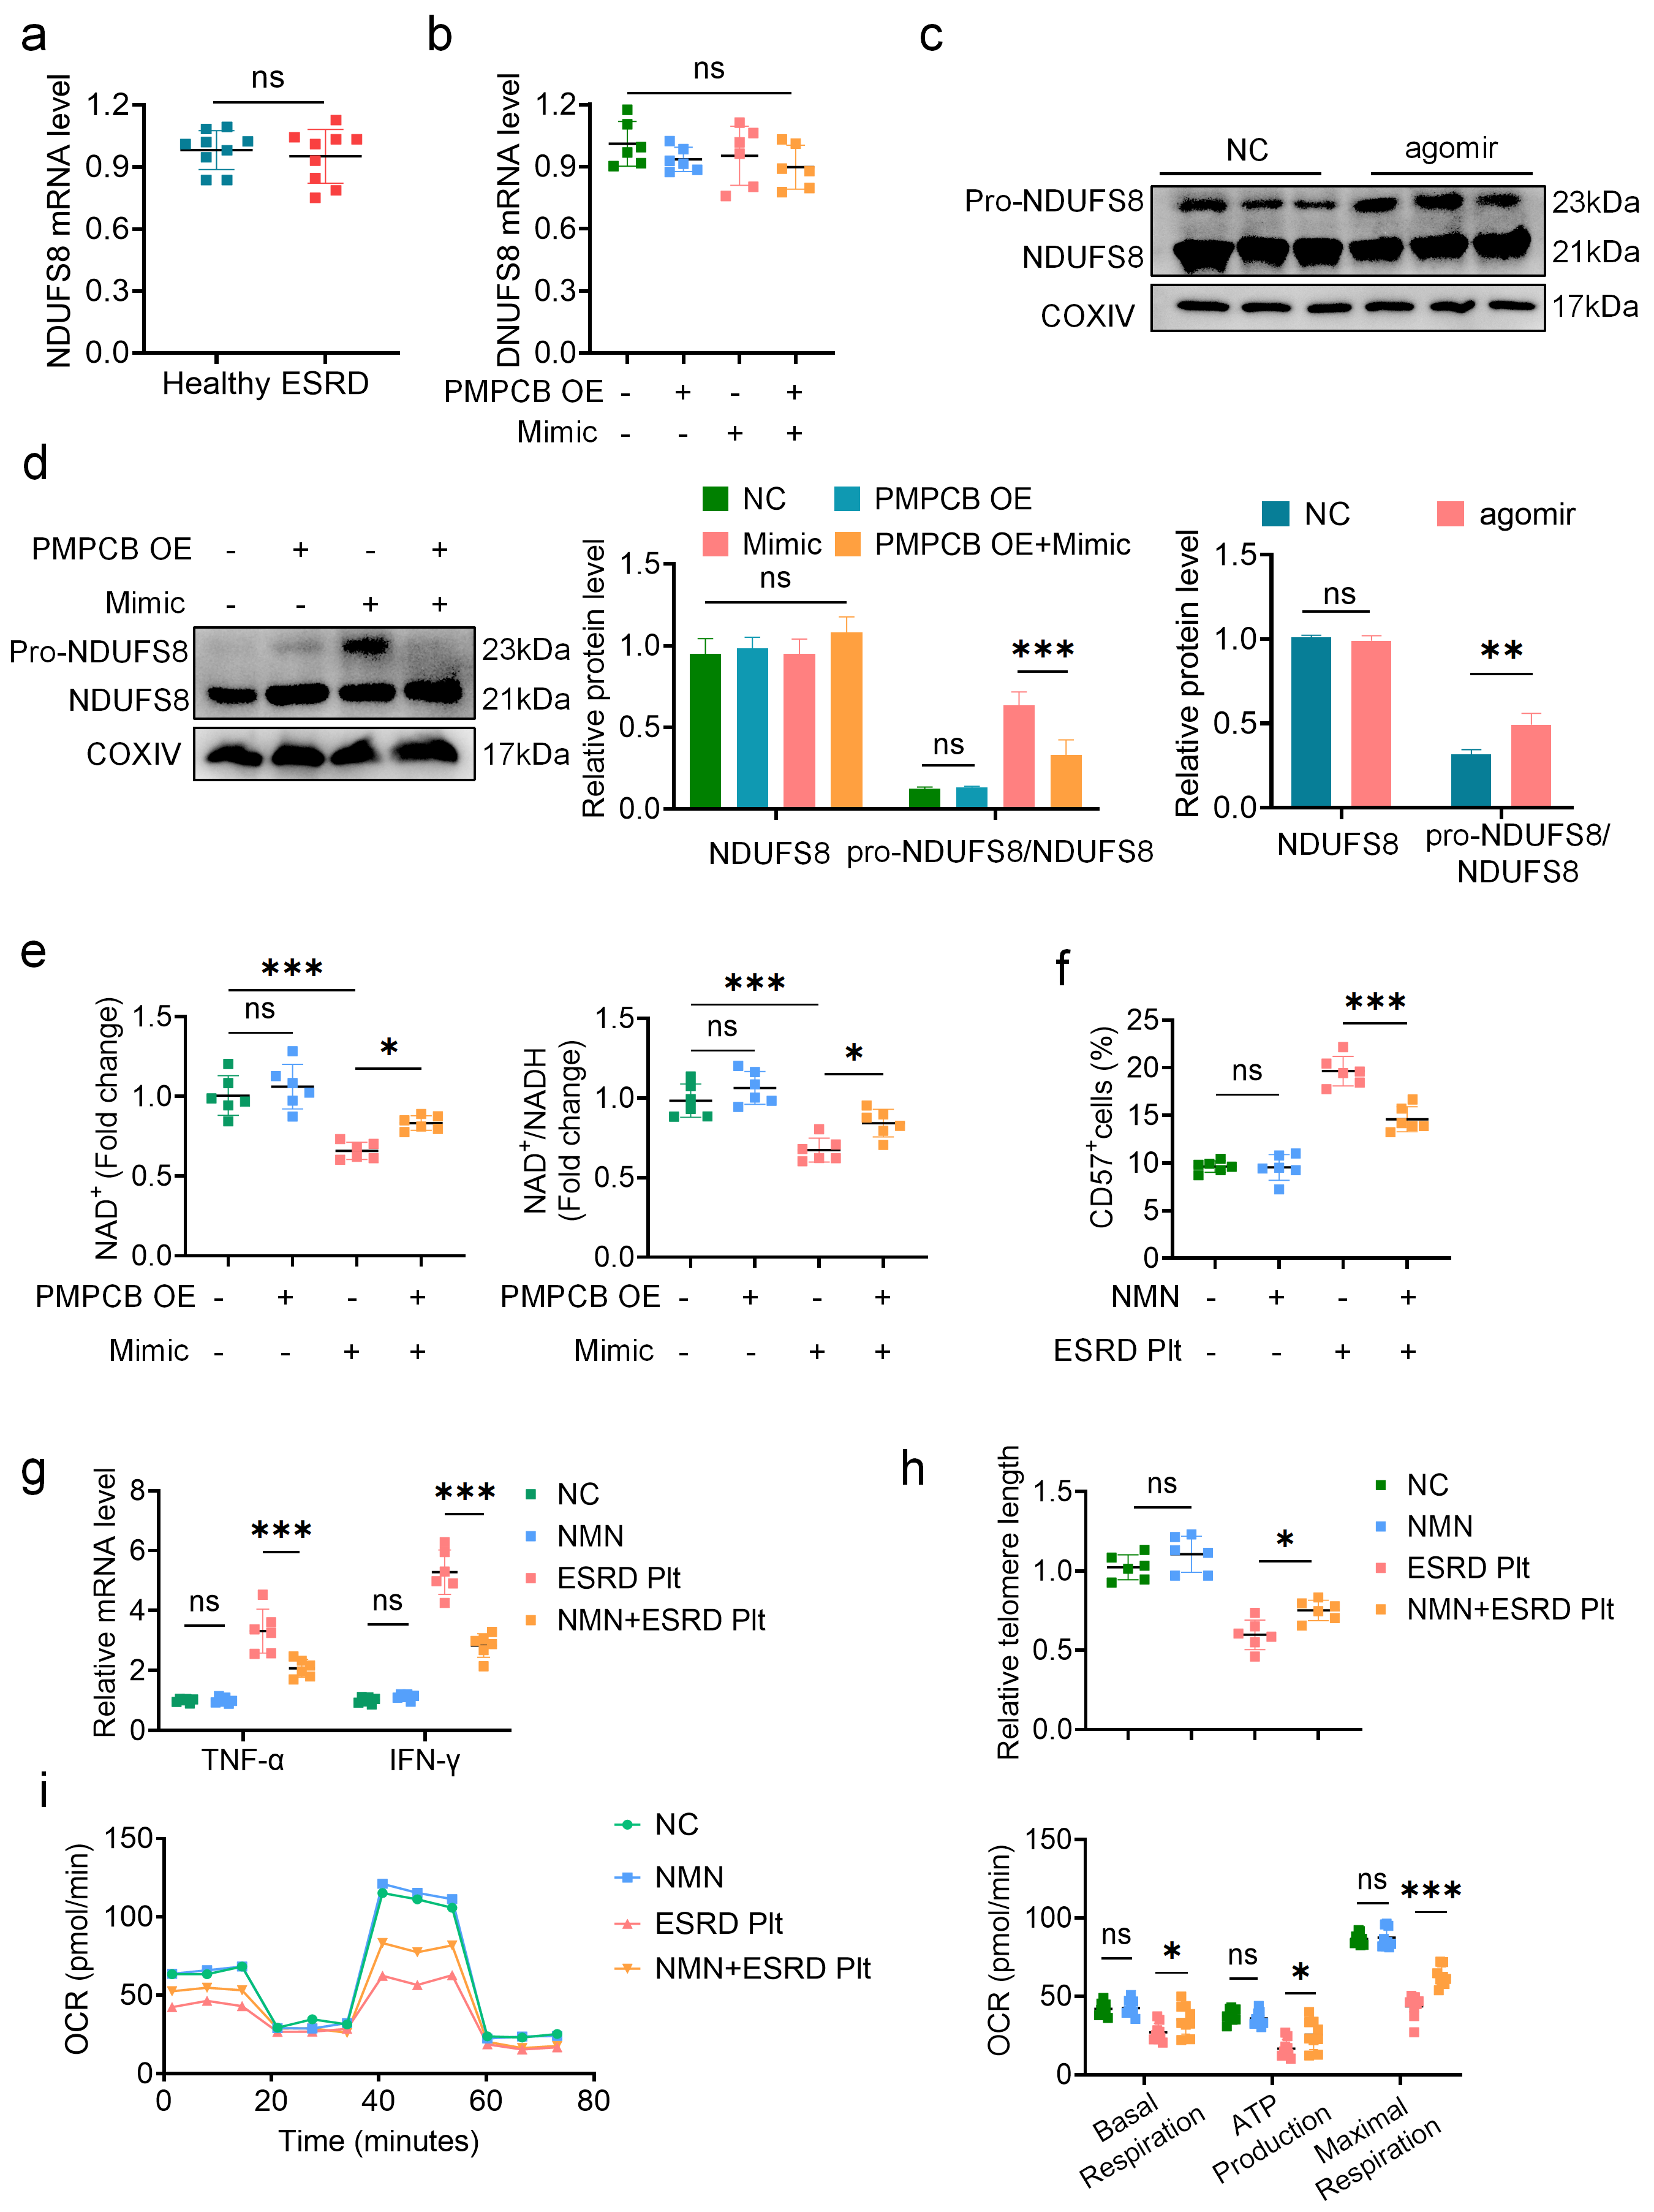
**

**Figure S11. NMN counteracts platelets from ESRD patients-induced and NDUFS8-mediated cellular senescence in CD8+ T cells.**

(a) qPCR analysis of NDUFS8 expression in CD8⁺ T cells of healthy controls and ESRD patients (n = 9). (b) qPCR analysis of NDUFS8 expression in CD8⁺ T cells co-transfected with PMPCB overexpression plasmid and miR-550a-5p mimic (n = 6). (c) Western blot analysis of NDUFS8 expression in peripheral blood CD8⁺ T cells of mouse treated with or without miR-550a-5p agomir (n = 3). (d) Western blot analysis of NDUFS8 expression co-transfected with PMPCB overexpression plasmid and miR-550a-5p mimic (n = 3). (e) NAD⁺ content and NAD⁺/NADH ratio in CD8⁺ T cells co-transfected with PMPCB overexpression plasmid and miR-550a-5p mimic (n = 6). (f) Flow cytometric analysis the proportion of CD57⁺ cells in CD8⁺ T cells pretreated with or without 100 µM NMN under co-cultured system (n = 6). (g) qPCR analysis of TNF-α and IFN-γ expression in CD8⁺ T cells pretreated with or without 100 µM NMN under co-cultured system (n = 6). (h) Relative telomere length in CD8⁺ T cells pretreated with or without 100 µM NMN under co-cultured system (n = 6). (i) OCR in CD8⁺ T cells pretreated with or without 100 µM NMN under co-cultured system, with quantitation of basal respiration, ATP production, and maximal respiration (n = 9). Data are presented as mean ± SD and were analyzed by ANOVA or 2-tailed, unpaired Student's t-test (a, c). ns: no significance. *P < 0.05, **P < 0.01, ***P < 0.001.

Figure S12


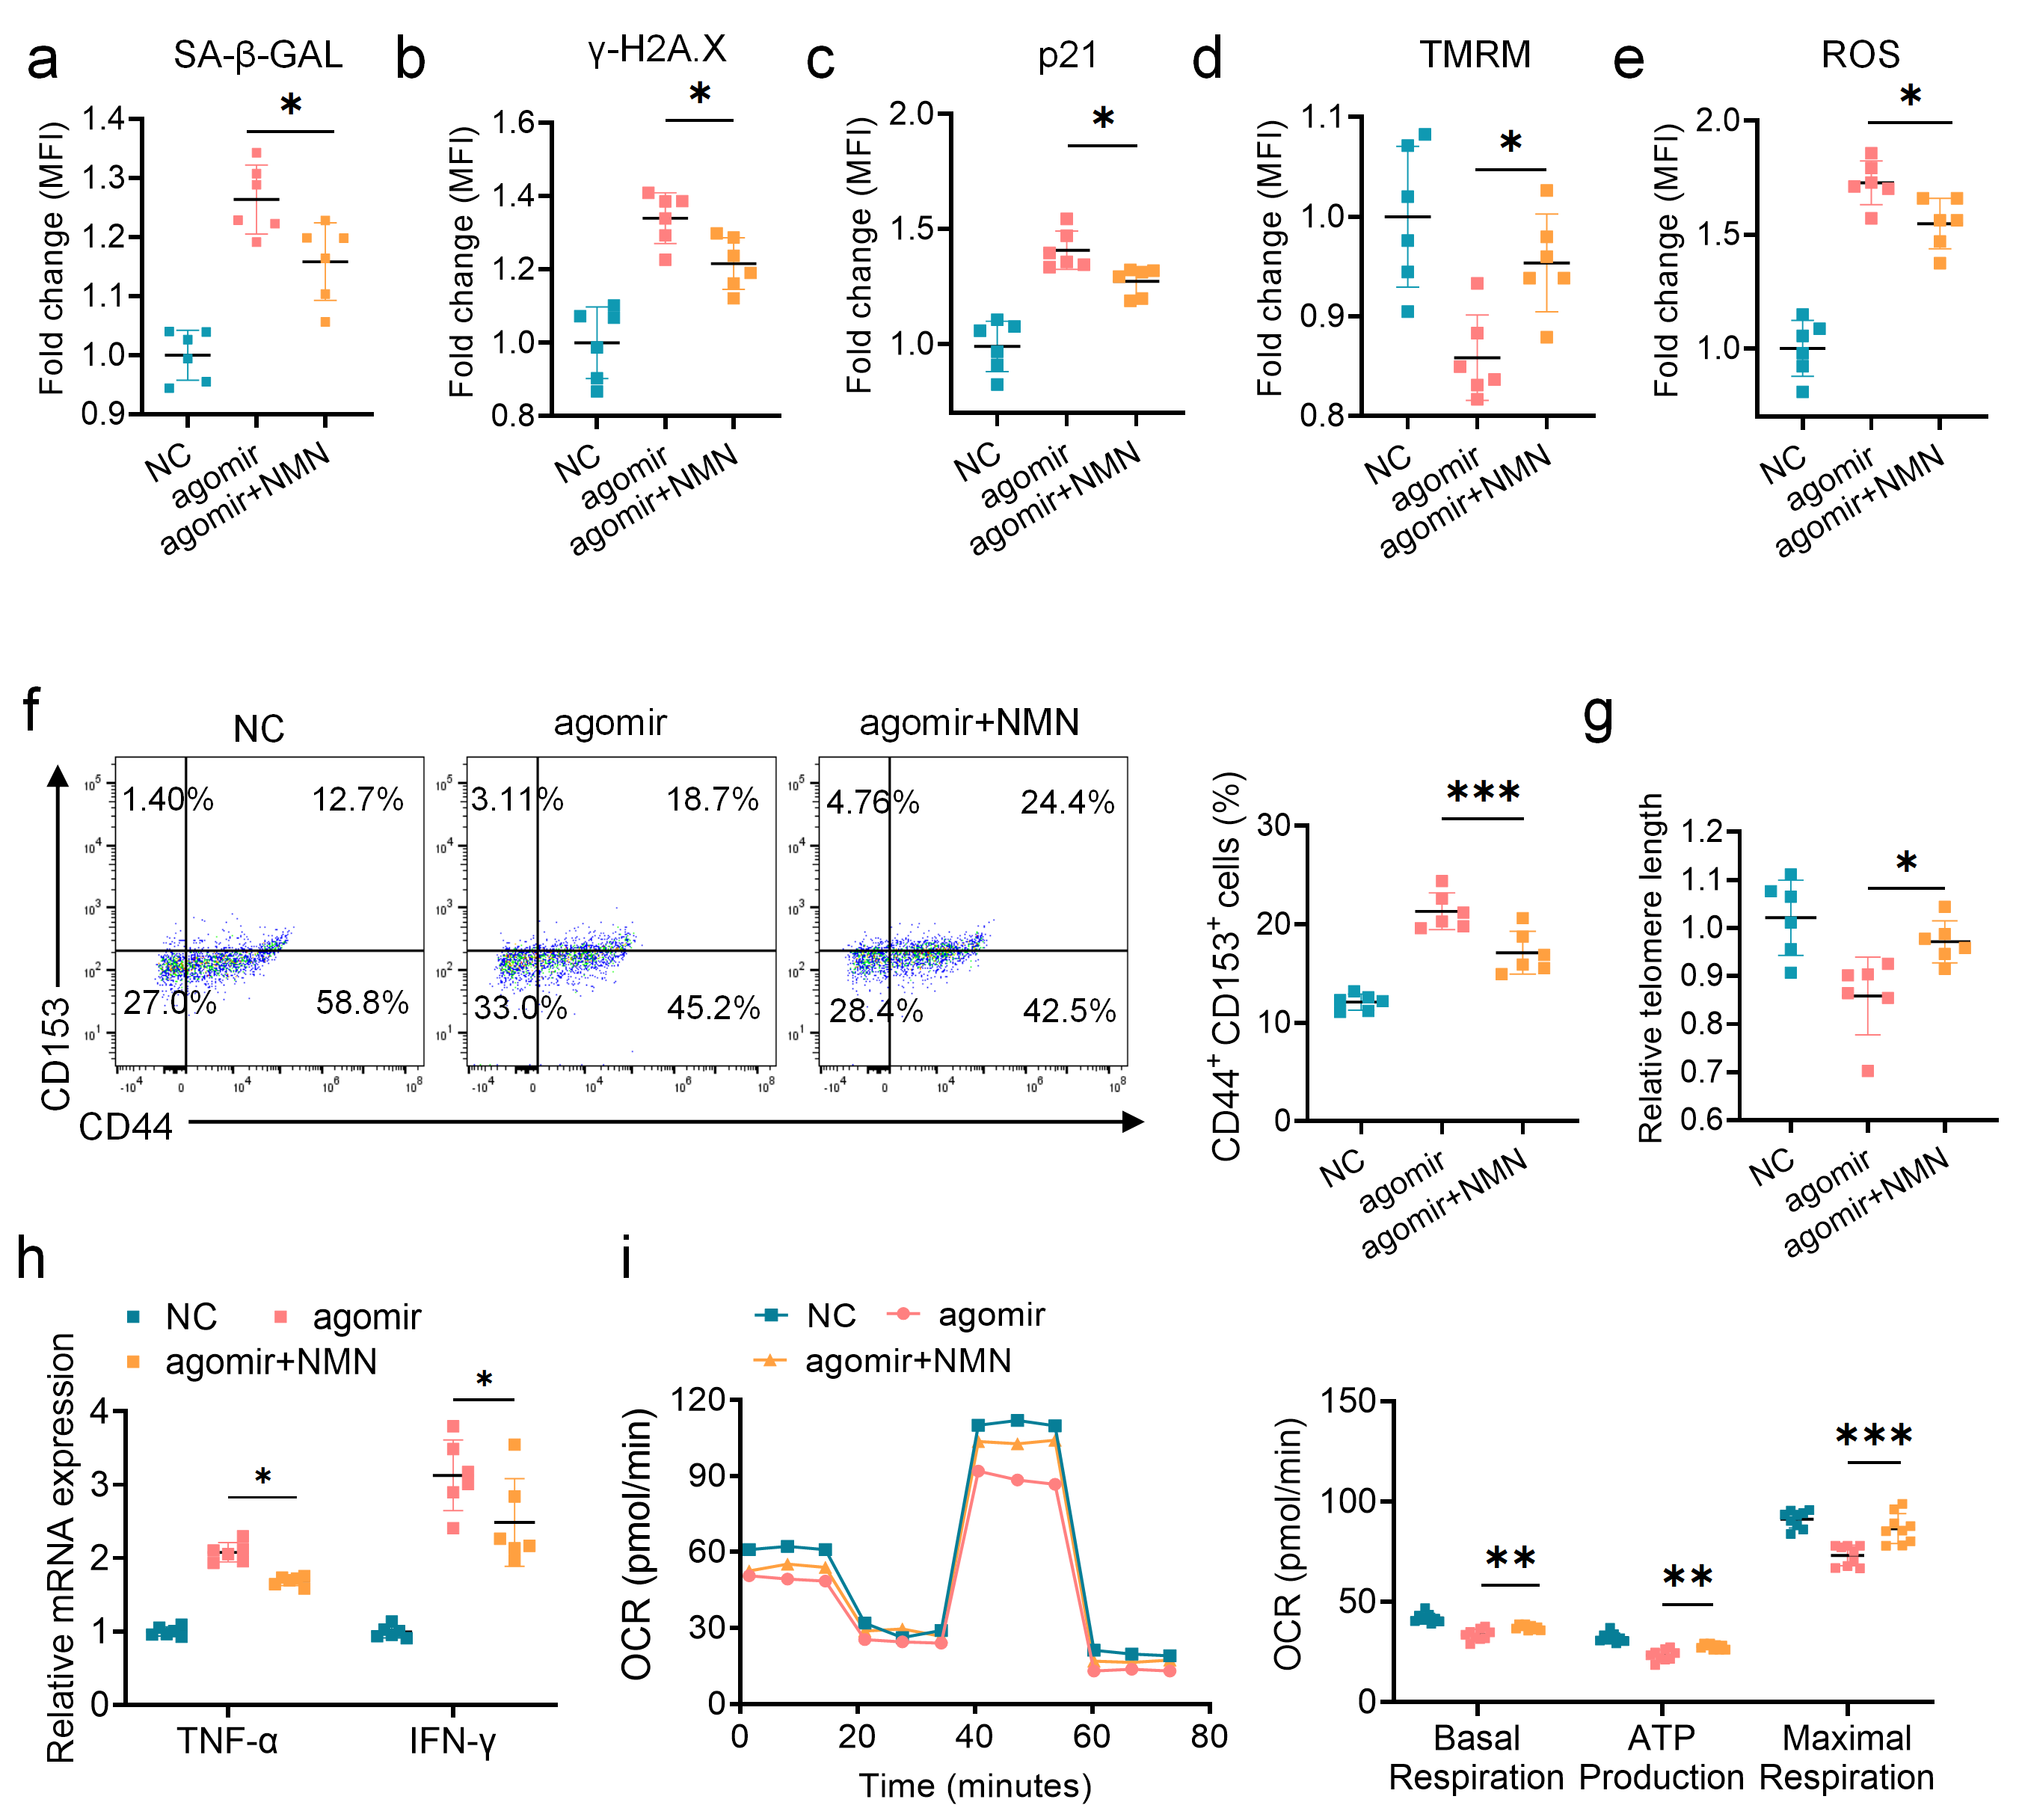


**Figure S12. NMN counteracts MiR-550a-5p agomir-induced cellular senescence of CD8+ T cells in vivo.**

(a-f) Flow cytometric analysis of SA-β-Gal activity (a), γ-H2AX level (b), p21 expression (c), TMRM levels(d), and ROS levels (e), proportion of CD44+CD154+ cells (f) in peripheral blood CD8+ T cells of mouse treated with or without miR-550a-5p agomir under NMN pretreatment (n=6). (g) Relative telomere length in peripheral blood CD8+ T cells of mouse treated with or without miR-550a-5p agomir under NMN pretreatment (n = 6). (h) qPCR analysis of TNF-α and IFN-γ expression in peripheral blood CD8+ T cells of mouse treated with or without miR-550a-5p agomir under NMN pretreatment (n = 6). (i) OCR in peripheral blood CD8+ T cells of mouse treated with or without miR-550a-5p agomir under NMN pretreatment, with quantitation of basal respiration, ATP production, and maximal respiration (n = 9). Data are presented as mean ± SD and were analyzed by one-way ANOVA (b). *P < 0.05, **P < 0.01, ***P < 0.001.
